1 **Mutagenesis and structural modeling implicate RME-8 IWN domains as conformational**  
2 **control points**

3 Anne Norris, Collin McManus, Simon Wang, Rachel Ying, Barth D. Grant

4

5 **Abstract**

6 After endocytosis, transmembrane cargo is differentially sorted into degradative or recycling  
7 pathways. This process is facilitated by recruitment into physically distinct degradative or  
8 recycling microdomains on the limiting membrane of individual endosomes. Endosomal sorting  
9 complexes required for transport (ESCRT) mark the degradative microdomain, while the  
10 recycling domain is marked by the retromer complex and associated proteins RME-8 and SNX-  
11 1. The separation of endosomal microdomains is also controlled by RME-8 and SNX-1, at least  
12 in part via removal of degradative component HRS/HGRS-1 from the recycling microdomain.  
13 This activity is likely due to recruitment and activation of chaperone Hsc70 to the recycling  
14 microdomain by the RME-8 DNAJ domain. To better understand the mechanism of RME-8  
15 function we performed a new phylogenetic analysis of RME-8 and identified new conserved  
16 sequence features. In a complementary approach, we performed structure-function analysis that  
17 identified the C-terminus as important for microdomain localization and likely substrate binding,  
18 while N-terminal sequences beyond the known single N-terminal PH-like domain are important  
19 for endosome recruitment. Random mutagenesis identified IWN4, and by analogy IWN3, to be  
20 important for the inhibitory DNAJ domain binding. Combining AlphaFold structural predictions  
21 with *in vivo* truncation and point mutation analysis of RME-8, we propose a model whereby  
22 SNX-1 and the IWN domains control the conformation of RME-8 and hence the productive  
23 exposure of the DNAJ domain. Furthermore, we propose that the activation of RME-8 is cyclical,  
24 with SNX-1 acting as an activator and a target of RME-8 uncoating activity.

25

26 **INTRODUCTION**

27 First identified in our screen for Receptor Mediated Endocytosis (RME) mutants in *C. elegans*  
28 [1,2], RME-8 is a conserved endosomal regulator required for cargo sorting [3-9]. It functions  
29 with Sorting Nexin 1 (SNX-1) and the Retromer complex in endosome to Golgi recycling [9].  
30 Together RME-8 and SNX-1 also negatively regulate the ESCRT complex that mediates  
31 degradation on the same endosomes [9,10] [11].

32

33 Endosome to Golgi sorting of transmembrane cargo occurs during the early to late endosome  
34 transition [12-14] (reviewed in [15]). Indeed, the recruitment of Retromer is dependent upon  
35 RAB-7, which is recruited to maturing endosomes during this transition [12]. The Retromer  
36 associated RME-8/SNX-1 marked recycling microdomain, and the ESCRT-0 marked  
37 degradative microdomain, are found adjacent to one another on endosomes during this  
38 transition [10]. The formation and separation of such endosomal microdomains are most easily  
39 studied in the context of *C. elegans* scavenger cells called coelomocytes, due to their naturally  
40 large endosomes that are typically more than 1 micron in diameter [10]. In this system we  
41 previously showed that RME-8 is required to preserve separation of recycling and degradative  
42 microdomains on sorting endosomes. In particular, RME-8 prevents overassembly of ESCRT-0  
43 that encroaches on and mixes with recycling microdomains when RME-8 is missing [10,11].  
44 This control of microdomains is a unique feature of RME-8 and SNX-1, as mutants lacking  
45 retromer components *vps-35* and *snx-3* have normal microdomain separation [10]. Like several  
46 other proteins involved in membrane trafficking, rare alleles of RME-8 have been implicated in  
47 neurodegenerative disorders such as Parkinson's Disease and Essential Tremor [16,17]  
48 (reviewed in [18-20]).

49

50 RME-8 is a large 260 kDa DNAJ domain protein with an N-terminal PI(3)P lipid binding domain  
51 and a C-terminal Retromer associated SNX-1 binding domain. Four conserved IWN repeats,

52 named for their central isoleucine, tryptophan, and asparagine residues, are dispersed  
53 throughout the protein, with two on either side of the central DNAJ-domain. These repeats are a  
54 defining feature of RME-8, found in all RME-8 homologs, but not other proteins.

55

56 The DNAJ domain is a 70 amino acid helical hairpin that recruits and activates the ATPase  
57 activity of Hsp70 enzymes. In Eukaryotes the Hsp70/DNAK protein family mediates local  
58 melting of three-dimensional protein structures. This activity promotes proper protein  
59 folding/refolding, solubilization of protein aggregates, assembly and disassembly of oligomeric  
60 structures, and translocation across membranes (reviewed in [25]).

61

62 The complexity and number of DNAJ domain proteins has increased tremendously over the  
63 course of evolution [21-23], with *C. elegans* having 34 members and Humans having over 50.  
64 The 260 kDa RME-8 protein is by far the largest DNAJ domain protein, most of which are small  
65 proteins of about 20 kDa. RME-8 is remarkably conserved throughout Eukarya with notable  
66 absences in Fungi and Gymnosperms.

67

68

69 While RME-8 represents an important endosomal regulator balancing recycling and degradative  
70 activities, how RME-8 itself is regulated has been unclear. We previously noted evidence for a  
71 physical interaction between the RME-8 DNAJ domain and sequences C-terminal to the RME-8  
72 DNAJ domain. We posited that the RME-8 C-terminus could occlude the productive DNAJ  
73 domain interaction with Hsc70. Another clue to RME-8 regulation is our previous observation  
74 that RME-8 and SNX-1 physically interact, with neither appearing to depend upon the other for  
75 endosomal recruitment [9-11].

76 In this study we identify new regions of interest conserved across phyla. Using structure function

77 analysis, we show that the C-terminus of RME-8 both forms an inhibitory RME-8 C-terminus/  
78 DNAJ domain interaction and controls microdomain segregation *in vivo*. Furthermore, we  
79 provide evidence that mutants in the IWN3 domain, but not IWN4, are hyperactive in uncoating  
80 ESCRT-0. Combining structural modeling with RME-8 mutagenesis and *in vivo* microdomain  
81 analysis we propose a model whereby SNX-1 disrupts an inhibited conformation of RME-8  
82 mediated by its own IWN domains. We posit that this disruption is needed for productive  
83 exposure of the DNAJ domain for uncoating of both its own activator, SNX-1, and ESCRT-0  
84 microdomains.

85

## 86 **RESULTS**

### 87 **RME-8 has ancient origins, high conservation of key domains, and new regions of** 88 **interest**

89 To better understand RME-8 and its domains we comprehensively analyzed its evolutionary  
90 conservation in the 4000 predicted proteomes available at NCBI. We used *C. elegans* RME-8  
91 as a query for a BLAST search, then filtered for >40% query coverage and <1E-3 e-value (see  
92 Methods). We found that RME-8 is scattered among Eukarya, as homologs are found in a  
93 diverse array of protists, such as the orphan protist lineage *Guillardia theta*, and in both free-  
94 living and parasitic protists such as *Entamoeba* and *Dictyostelium*, but absent in *Trichomonas*,  
95 *Giardia* and Alveolates (Figure 1A). Interestingly, RME-8 is completely absent from Fungi, but  
96 present in the closely related *Choanoflagellates* and Sponges. Additionally, RME-8 is mostly  
97 present in Plants except for Gymnosperms. This pattern suggests an ancient origin for RME-8,  
98 with selective loss in specific lineages.

99

100 Given the broad array of sequences compared, our analysis narrows and illuminates key  
101 domains in RME-8. Not surprisingly the DNAJ-domain is a highly conserved feature, as DNAJ

102 domains are ancient and widely conserved in all kingdoms of life (Figure 1B and 1C, and 1S).  
103 Despite being well conserved in animals, both the extreme N-terminal lipid binding domain, as  
104 defined by [29], and the IWN1 repeat, display low sequence conservation across Eukarya. The  
105 IWN2, IWN3 and IWN4 repeats, however, display strong conservation throughout Eukarya  
106 (Figure 1C). The regions from the RME-8 N-terminus to just before IWN2 are much less  
107 conserved than the remaining C-terminal sequences (Figure 1C). Moreover, the Parkinson's  
108 associated residue N855 is only conserved in animals (Figure 1C).

109

110 Our analysis also reveals new areas of interest outside of the defined functional domains.  
111 Specifically, residues just adjacent to IWN2 are highly conserved, as are sequences between  
112 the DNAJ-domain and IWN3. Additionally, the region between IWN3 and IWN4 displays strong  
113 conservation (See figure 1C and 1S). In the current study we set out to better understand the  
114 function of the IWN domains of RME-8 with respect to their role in controlling endosomal  
115 microdomains. Furthermore, we propose potential functions for the newly highlighted regions  
116 and IWN 2-4 domains.

117

118 **The RME-8 IWN regions are important for membrane localization and microdomain**  
119 **positioning**

120 The position of endosomes is stereotyped in the six specialized *C. elegans* scavenger cells  
121 called coelomocytes. RAB-5 marked early endosomes are located toward the periphery of the  
122 radially symmetrical disc shaped coelomocyte (Figure 2B, illustrated in 2A). RAB-7 marked late  
123 endosomes and lysosomes localize more toward the interior (Figure 2C, illustrated in 2A)  
124 [2][30]. The Golgi forms dispersed ministacks typical of invertebrate cells, and the nucleus is  
125 positioned centrally (See Figure 2A). RME-8 localizes to recycling microdomains of the early  
126 endosomes, most easily observed in coelomocytes because their endosomes are naturally quite  
127 large (1-5 micron diameter) [9,10]. We find that the bulk of RME-8 microdomains on peripheral  
128 endosomes are oriented toward the plasma membrane (Figure 2D).

129

130 To further study the role of the IWN-domains for RME-8 function *in vivo*, we created a series of  
131 deletion transgenes that express tagged RME-8 missing certain IWNs and their surrounding  
132 sequences (Illustrated in Figure 2G and S2). We measured how the RME-8 truncations  
133 compared to wild-type in their ability to localize to discrete microdomains on endosomes of the  
134 coelomocyte. RME-8 retaining the established lipid binding domain [29] but missing intervening  
135 sequence before the J-domain, is less membrane localized than wild-type RME-8, with more  
136 diffuse labeling in the cytoplasm (Figure 2E, quantified in 2H). This result suggests that N-  
137 terminal sequences outside of the previously defined lipid binding domain contribute to  
138 endosomal recruitment (see below). Interestingly, the remaining endosomal localization that did  
139 occur in these deletion mutants still segregated into peripherally facing microdomains like wild-  
140 type RME-8 (Figure 2D and C, quantified in 2I). Taken together these results suggest that the  
141 N-terminal amino acids containing IWN1 and IWN2 repeats (aa100-1321) (See figure 1B) play a  
142 role in membrane association, but do not control RME-8 microdomain localization.

143

144 In stark contrast, RME-8 lacking the C-terminal IWN3 and/or IWN4 regions displayed both more

145 intense endosome localization, and broader spread on the endosomal limiting membrane  
146 (Figure 2D, 2F, quantified in 2H, 2I, and S2). Moreover, the physically distinct recycling and  
147 degradative microdomains become mixed in the RME-8 IWN3 and/or IWN4 deletion strains  
148 (Figure 3E, 3G, illustrated in 3I, quantified in 3H). While the localization of RME-8 C-terminal  
149 truncation mutant protein spreads around the endosome, tagged SNX-1 remained in peripheral  
150 microdomains in these strains (Figure 3A, 3C, illustrated in 3I, quantified in 3D).

151

152 Taken together, these results indicate that the RME-8 sequences N-terminal to the DNAJ  
153 domain, and sequences C-terminal to the DNAJ domain, have distinct functions. N-terminal  
154 sequences well beyond the previously proposed lipid binding domain contribute to membrane  
155 association, but not microdomain segregation. The microdomain segregation function requires  
156 both the IWN3 and IWN4 regions, as loss of either leads to RME-8 spreading around the  
157 endosome and microdomain mixing. Moreover, given that deletion of IWN3 or IWN4 regions  
158 leads to increased membrane localization, as measured by membrane to cytoplasm ratio  
159 (Figure 2H), IWN3 and IWN4 regions may contribute to removal of RME-8 from the endosome  
160 as it cycles on and off the membrane.

161

### 162 **The RME-8 IWN3 and IWN4 regions are required for RME-8 to uncoat ESCRT-0**

163 A significant role for RME-8 in directing cargo sorting is to limit the growth of the degradative  
164 microdomain. Moreover RME-8 prevents the degradative machinery from entering the recycling  
165 microdomain, consequently limiting degradation of endocytosed cargo that should recycle [10].

166 In the absence of RME-8, ESCRT-0 component HRS/HGRS-1 over accumulates on the  
167 endosomes, and mixes with the recycling domain [10].

168

169 We found that RME-8 mutants lacking IWN3 and IWN4 regions fail to rescue the HRS/HGRS-1

170 overaccumulation phenotype of *rme-8(b1023ts)* mutants (Figure 3K-N, quantified 3P). This  
171 inability to uncoat HRS/HGRS-1 occurs despite a marked increase in RME-8( $\Delta$ IWN3+ $\Delta$ IWN4)  
172 spatial overlap with HRS/HGRS-1 (Figure 3G, quantified in 3H, illustrated in 3J). RME-8 N-  
173 terminal truncation ( $\Delta$ IWN1+2), did however retain a very weak ability to uncoat HRS (Figure 3L,  
174 Quantified in 3P). We note that none of the truncation mutants of RME-8 appear fully functional,  
175 as they all fail to rescue the smaller coelomocyte size phenotype that occurs upon loss of RME-  
176 8 (Figure 3O).

177

### 178 **The RME-8 DNAJ domain inhibits the SNX-1/RME-8 interaction**

179 Our previous work indicated that RME-8 sequences C-terminal to the DNAJ domain interact  
180 with both the RME-8 DNAJ domain and to the helical BAR domain of SNX-1 [9]. We postulated  
181 that SNX-1 binding to RME-8 C-terminal sequences may compete with the RME-8 C-terminal  
182 sequence binding to the RME-8 DNAJ domain, contributing to DNAJ domain regulation (See  
183 Figure 4I). Consistent with such a competition, we found that the presence of the DNAJ domain  
184 decreased the RME-8/SNX-1 interaction as assayed by yeast two-hybrid (Figure 4A, S4). This  
185 result held true using either a minimal region that only includes the IWN3 region, or the optimal  
186 region that includes both IWN3 and IWN4 domains (Figure 4A, S4). Taken together these  
187 results supports the hypothesis that the SNX-1 domain competes with the RME-8 C-term/DNAJ  
188 interaction and is consistent with an *in vivo* role for SNX-1 in activating RME-8 by increasing the  
189 availability of the DNAJ domain to interact with substrates.

190

### 191 **Charge reversals in IWN4 and IWN3 alter the RME-8 C-terminus/SNX-1 and RME-8 C- 192 terminus/DNAJ interactions**

193 To further understand this potential competition, we sought to identify key residues in RME-8  
194 that mediate the DNAJ versus SNX-1 interactions. To this end, we used error prone PCR to



195 create a library of random mutations in RME-8 C-terminal to the DNAJ domain and screened for  
196 those mutations that imparted improved interaction with SNX-1 in yeast 2-hybrid. The RME-8 C-  
197 terminal fragment containing the DNAJ-domain paired with SNX-1 grows on the less stringent  
198 assay media SC-HIS (Figure S3), indicating an interaction, but, importantly, does not grow on  
199 the more stringent assay media SC-URA (Figure 4B). This difference enabled selection for  
200 putative improved RME-8/SNX-1 binding mutants on SC-URA. Given that in PCR mutagenesis  
201 the most common errors are premature stop codons and frame shifts, selecting for an improved  
202 SNX-1 interaction enriches informative full-length RME-8 point mutants.

203

204 This screen yielded two mutants (E1962K and N1966K), both of which altered residues in the  
205 IWN4 domain of RME-8. Suggesting that charge may play a role, both mutations replaced an  
206 acidic residue (E1962) or a polar residue (N1966) with the basic residue lysine (Figure 4B and  
207 4D). Likewise, further tests showed that replacing E1962 with arginine also led to growth of the  
208 RME-8 bait with SNX-1 BAR domain prey on the SC-URA stringent assay media (Figure 4B).  
209 This result suggests that the charge of the IWN4 region is important. Importantly, a separate  
210 pulldown assay showed that the IWN4 E1962K mutation significantly reduced binding between  
211 the DNAJ domain and the IWN3-IWN4 containing fragment of RME-8, an unselected effect.  
212 This result is consistent with our hypothesis that IWN4 mutations are improving SNX-1 binding  
213 by reducing a competing binding reaction with the RME-8 DNAJ domain (Figure 6E).

214

215 Given the IWN3 central positioning in the minimal SNX-1 binding domain, as well as its similarity  
216 to IWN4, we also tested similar charge reversals of acidic residues in IWN3. We found that  
217 introduction of a D1657K mutation in IWN3 also reduced interaction between the DNAJ domain  
218 and the IWN3-IWN4 containing domain (Figure 4C). However, unlike with IWN4, D1657K  
219 mutation in RME-8 IWN3 did not alter the RME-8/SNX-1 interaction (Figure 4B). Taken together

220 these data support the idea that the acidic residues of IWN4 and IWN3 are important for a  
221 DNAJ domain/RME-8 C-term self-interaction.

222

223 **Charge reversals near the DNAJ domain active site also alter the RME-8/SNX-1**  
224 **interaction**

225 If the acidic residues of IWN4 and IWN3 mediate an electrostatic interaction with the DNAJ  
226 domain, we would expect to find complementary basic residues in the DNAJ-domain that would  
227 have a similar role in informing the SNX-1/RME-8 interaction. Indeed, several lysine and  
228 arginine residues on helix II of all DNAJ domains create a surface exposed basic patch (shown  
229 in blue) adjacent to the catalytic HPD residues that reside between helix II and III (figure 4E  
230 [21,31-33]). This basic patch has been implicated in Hsc70 binding to DNAJ domains, and thus  
231 any domain interactions with this patch could regulate Hsc70 activation [32,34].

232

233 With an analogous strategy to that which identified the IWN4 mutants, we targeted the lysines  
234 and arginines (figure 4F) of helix II and III in the predicted RME-8 DNAJ-domain basic patch  
235 (Figure 4E). We used doped oligo directed mutagenesis to screen for an improved RME-8/SNX-  
236 1 interaction (See methods). Transformants were selected on SC-URA and sequenced. The  
237 arginine residues of the DNAJ-domain were screened in a separate but similar fashion.

238

239 Our screen identified a K1347E/K1356E double mutant that produced robust growth on SC-  
240 URA (Figure 4F). Analogous residues in the *E. coli* DnaJ protein were found to both contribute  
241 to DNAK(Hsc70) binding and to be important for the DNAJ *in vivo* activity [32,34]. After a week  
242 of growth on SC-URA the R1342E/R1343E double mutant, that displayed some growth (Figure  
243 S4), suggesting that the basic nature of the DNAJ domain is important.

244

245 If the improved SNX-1 binding of these DNAJ-domain mutants is due to a disruption of the

246 RME-8 C-terminus/DNAJ-domain self-interaction, we would expect these mutants to display  
247 decreased ability to bind to the RME-8 C-terminus. To this end we performed a pull-down assay  
248 in which GST tagged wild-type or mutant DNAJ domain was used as bait with RME-8(1388-  
249 2279) prey. We found that the charge reversals in the DNAJ domain weakened its interaction  
250 with the RME-8 C-terminus (Figure 4G,H). These results suggest that K1347E and K1356E  
251 depress the RME-8 self-interaction in favor of an RME-8/SNX-1 interaction (See 4I for  
252 illustration).

253

### 254 **RME-8 D1657K (IWN3\*) is hyperactive for uncoating HRS/HGRS-1**

255 A key function of RME-8 and SNX-1 is to limit the assembly of the ESCRT-0 microdomain [10].  
256 Hence, we tested the functionality of our newly identified IWN3 and IWN4 altered alleles of  
257 RME-8 *in vivo*. Importantly, we found a significant reduction of HRS/HGRS-1 on endosomes in  
258 transgenic animals expressing the RME-8(IWN3\*) D1657K mutant, but not in IWN4\*(Figure 5A-  
259 C", quantified in 5E). Since this is the opposite effect of *rme-8* loss-of-function, these results  
260 indicate that RME-8(IWN3\*) is hyperactive.

261 This hyperactivity can likely be attributed to reduced inhibition of the DNAJ domain when IWN3  
262 is mutated. Importantly, RME-8(IWN3\*) also shows increased overlap with the normally  
263 physically distinct ESCRT-0 microdomain, consistent with more HRS/HGRS-1 engagement and  
264 disassembly (Figure 5A-C", quantified in 5D, illustrated in 5F). Conversely, *in vivo* we observe  
265 SNX-1 colocalization with RME-8 is dramatically lower for RME-8(IWN3\*) than with wild-type  
266 RME-8 (Figure 6F-G", quantified in 6J, illustrated in 6K). Our results for IWN4 mutants, that  
267 display an increase in SNX-1 binding, were different. Indeed, none of these altered HRS/HGRS-  
268 1 accumulation (Figure 5C" and S4, quantified in 5E and S4). We tested CRISPR mediated  
269 endogenous alterations E1962K, and a triple lysine substitution at E1959, E1962, or N1966  
270 (Figure S5). We also tested the IWN4\* transgene E1959, E1962, E1967 (Figure 5C"). Taken

271 together these results suggest that RME-8 may in part act independently of SNX-1 for  
272 degradative domain uncoating activity.

273

#### 274 **RME-8(+) can regulate RME-8(IWN3\*)**

275 Interestingly, the hyperactivity of RME-8(IWN3\*) in reducing HGRS-1/Hrs levels on endosomes  
276 was blocked by endogenous wild-type RME-8, since we only observed this hyperactivity of  
277 RME-8(IWN3\*) when endogenous RME-8 was removed by temperature shift of (*b1023ts*)  
278 mutants (Figure 5A” and B”, quantified in 5E). As mentioned above, the microdomain positioning  
279 of the hyperactive RME-8(IWN3\*) shows more overlap with HGRS-1/Hrs (Figure 5A-C,  
280 quantified in 5D, illustrated in 5F), and is shifted internally, away from the plasma membrane  
281 (Figure 6B and 6D, quantified in 6I, illustrated in 6J). This effect could be diminished by  
282 overexpression on wild-type RME-8 (Figure 6E-F” quantified in 6I, illustrated in 6L). The ability  
283 of wild-type RME-8 to inhibit the increased uncoating activity of RME-8(IWN3\*), and to affect the  
284 localization of RME-8(IWN3\*), suggests that RME-8 may homo-oligomerize, with wild-type  
285 RME-8 able to bind and inhibit RME-8(IWN3\*).

286

#### 287 **RME-8 endosomal positioning is also altered by expression level and SNX-1**

288 RME-8(+) displays a very peripheral and clumpy microdomain localization in *snx-1(0)* mutants,  
289 the opposite microdomain localization of RME-8(IWN3\*) (Figure 6C and 6D, quantified in 6I,  
290 illustrated in 6J). These differences suggest that while at some point in its activation cycle RME-  
291 8 may act independently of SNX-1, SNX-1 still strongly influences RME-8 localization and  
292 activation. Indeed, the increased peripheral localization of RME-8(+) in *snx-1(0)* mutants is  
293 similar to higher levels of RME-8(+) overexpression (Figure 6E-E”). This result supports the idea  
294 of a competition between SNX-1 binding and RME-8 self-binding. These results also appear

295 more compatible with RME-8 self-interactions occurring via homodimers rather than self-  
296 interaction within one molecule.

297

### 298 **RME-8 regulates SNX-1 dynamics**

299 RME-8 and SNX-1 are binding partners, and both potentiate retrograde recycling and the  
300 separation of degradative and recycling microdomains on sorting endosomes [9,10]. The  
301 optimal SNX-1 binding domain of RME-8 encompasses IWN3 and IWN4 (Figure 4A). Indeed,  
302 without IWN3, IWN4, or both, RME-8 and SNX-1 display reduced overlap and appear  
303 disengaged (Figure 3C, quantified in 3D, illustrated in 3I) as RME-8 lacking these sequences  
304 does not segregate into a microdomain, but rather spreads throughout the endosome (Figure  
305 3C, quantified in 3F, illustrated in 3G). In mammalian cells when RME-8 is depleted by siRNA,  
306 mammalian Snx1 accumulates on endosome associated membrane tubules [35]. Similarly, we  
307 observe SNX-1 overaccumulation on endosomes in *rme-8(b1023ts)* mutants at restrictive  
308 temperature (Figure 7A, quantified in 7F). Unlike IWN3\* and WT, none of the RME-8 domain  
309 deletion mutants can rescue SNX-1 overaccumulation in *rme-8ts* mutant animals (Figure 7C  
310 and D, quantified in 7F). Moreover, the size of SNX-1 microdomains are diminished rather than  
311 enlarged in the RME-8(IWN3\*) expressing animals (Figure 7E, quantified in 7G). Not only does  
312 SNX-1 over accumulate in the absence of RME-8, but recovery after photobleaching of GFP-  
313 SNX-1 on endosomes is much slower than wild-type, never recovering to the levels found in  
314 animals expressing wild-type RME-8 within the time-frame monitored (Figure 7H-I''', quantified  
315 in 7J). These results suggest that SNX-1 may be a substrate for RME-8/Hsc70  
316 assembly/disassembly activities, in addition to acting as an activator of RME-8 uncoating activity  
317 toward the degradative microdomain.

318

319

320

## 321 **DISCUSSION**

322

323 Endosomes are organelles that play an essential role in protein and lipid sorting in all eukaryotic  
324 cells. Over the past 20 years evidence has emerged that microdomains of endosomal limiting  
325 membranes are key features of endosomes, with specific coat complexes representing  
326 competitive activities of the endosome that define these microdomains. Physical self-  
327 associations and/or oligomerization as is seen with HRS/HGRS-1 can partially explain the  
328 segregation of microdomains (For review see [11]). Additional cross-regulatory interactions  
329 between degradative and recycling microdomains also occur [9,10,36], but little is known of the  
330 molecular mechanisms that separate these coat complexes to maintain efficient endosome  
331 function. In our previous work we identified RME-8 as a key protein in this process, acting to  
332 keep recycling and degradation in balance.

333

334 Recycling microdomain components and binding partners RME-8 and SNX-1 are required to  
335 limit the assembly of the opposing degradative microdomain. The pair likely act by  
336 disassembling ESCRT-0 complexes that encroach into the recycling domain where they could  
337 interfere with recycling. Here we sought to better understand how the large and complex RME-8  
338 protein functions using structure-function analysis. In this study we define a role for sequences  
339 N-terminal to the DNAJ domain in endosomal recruitment. We also extend our previous model  
340 suggesting that an interaction between the DNAJ domain and sequences C-terminal to it  
341 regulate RME-8 activity.

342

### 343 **Predicted structure of RME-8 via AlphaFold**

344 During the late phases of completing this manuscript, a new highly lauded AI-based system for

345 protein structure prediction, called AlphaFold, was released. Thus, we sought to analyze the  
346 AlphaFold predicted structure for *C. elegans* RME-8 (see  
347 <https://AlphaFold.ebi.ac.uk/entry/G5ED36>) with respect to our structure-function results [37].  
348 The predicted structure shows an N-terminal domain that is enriched in beta-sheets (Figure 8H  
349 and see below). Outside of the N-terminal first 400 amino acids, much of the predicted RME-8  
350 structure consists of a series of 5 alpha-solenoids containing HEAT repeats, with short linkers  
351 between them (Figure 8A-D). Remarkably, these linkers correspond to the RME-8 IWN domains  
352 (IWN domains denoted in blue 8A,B and 8E-G). AlphaFold also predicts that the small DNAJ  
353 domain protrudes from RME-8, extending from the 3rd alpha-solenoid back toward the 2nd  
354 alpha-solenoid, positioned adjacent to IWN2 (Figure 8A and B). We colored the predicted 3-  
355 dimensional structure according to our pan-Eukarya conservation analysis from Figure 1 and S1  
356 (Figure 8C and 8D). This conservation analysis indicates that in addition to IWN2, the regions  
357 outside of, but adjacent to, IWN2 and DNAJ might contribute to this DNAJ domain orientation  
358 (see yellow arrows Figure 1 and 1S). Moreover, a region encompassing solenoid S3, S4, and  
359 part of S5 is highly conserved.

360

### 361 **RME-8 N-terminus has three PH-like domains rather than one**

362 Previous work indicated that human RME-8 contains an N-terminal PH-like domain, similar to  
363 the PH-domain of FERM1 [29] (Figure 8I). This domain was shown to preferentially bind  
364 membranes enriched in PI(3)P and PI(3,5)P2, phosphoinositides well known for recruiting  
365 peripheral membrane proteins to early and late endosomes [29]. Our new *in vivo* structure-  
366 function analysis indicated additional adjacent sequences in RME-8 beyond this region that  
367 contribute to endosome recruitment (Figure 2E).

368

369 While not apparent in the primary sequence, using the Pymol™ align feature to our analyze of

370 the AlphaFold predicted structure, we identified two additional PH-like domains within the first  
371 400 amino acids of RME-8 (Figure 8H-I). All three predicted PH-like domains, including the  
372 previously described domain at the extreme N-terminus, are structurally similar to the FERM1  
373 PH domain (Figure 8H-I). A requirement for the two additional predicted PH-like domains  
374 provides a simple explanation for our results showing a requirement for additional sequences in  
375 this region of RME-8 for efficient membrane recruitment (Figure 2E quantified in 2H). Taken  
376 together these results suggest three PH-like domains may work in concert to direct RME-8 to  
377 the endosomal membrane via phosphoinositide lipid binding.

378

### 379 **IWN motifs as conformational control points in autoinhibition**

380 As described above, the AlphaFold prediction suggests that the bulk of RME-8 consists of a  
381 series of 5 alpha-solenoids with short linkers between them (Figure 8A). These linkers between  
382 solenoids are predicted to lie within the IWN motifs, where they are predicted to occur as short  
383 beta-strands that terminate an alpha-helix (Figure 8A and 8D, 8E). The IWN tryptophan residue  
384 is predicted to be buried and surrounded by hydrophobic residues (Figure 8F). The isoleucine  
385 and asparagine, however, are predicted to be on the opposite side of the beta strand, both  
386 interacting with nearby peptide backbone features. We find that all four IWNs display similar  
387 predicted secondary and tertiary structure (Figure 8D). In the Case of IWN3, the aspartic acid  
388 1657 that is mutated to lysine in IWN3\*, is predicted to interact with the adjacent alpha-helix  
389 (Figure 8G). A substitution of lysine at this position would likely be quite disruptive to the  
390 orientation of the third and fourth solenoids.

391

392 The prediction that the conserved IWN repeats represent linkers between domains supports the  
393 idea that the IWN motifs control large scale conformational changes in RME-8. This is  
394 consistent with our new data that sequences in RME-8 C-terminal to the DNAJ domain contain



395 autoinhibitory activity, especially our finding that a single point mutation in IWN3 is sufficient to  
396 produce a hyperactive protein, and that IWN3 and IWN4 regions of the protein physically  
397 interact with the DNAJ domain. We currently favor a model in which the relevant autoinhibitory  
398 interactions between IWN3-IWN4 and the DNAJ domain occurs between RME-8 molecules in  
399 an oligomer, rather than within a single RME-8 molecule. In particular, our finding that wild-type  
400 RME-8 can inhibit the hyperactivity and alter the microdomain positioning of the IWN3\* mutant  
401 version of RME-8 could be explained if oligomerized RME-8 molecules are autoinhibited.

402

### 403 **The role of SNX-1**

404 We have previously proposed that SNX-1 is a positive regulator of RME-8 as loss of either SNX-  
405 1 or RME-8 has similar effects on cargo recycling and expansion of the degradative  
406 microdomain [10]. Our model predicts that SNX-1 binding derepresses RME-8, allowing RME-8  
407 to uncoat both ESCRT-0 and, intriguingly, SNX-1 itself. If oligomerization of RME-8 inhibits  
408 activity, then SNX-1 binding could act to release active RME-8 monomers that can work with  
409 Hsc70 to disassemble both SNX-1 and ESCRT-0 complexes (Figure 9B).

410

411 According to this model, when the RME-8/DNAJ interaction is reduced, as in the case of IWN3\*,  
412 more RME-8 can de-oligomerize and shift its positioning to invade the degradative  
413 microdomain, leading to the hyperactive uncoating of HRS/HGRS-1 that we observe with  
414 IWN3\*(Figure 9B and 9E). As with IWN3\*, IWN4\* also reduces RME-8/DNAJ interaction, but the  
415 interaction with SNX-1 is different. IWN4\* improves the interaction with SNX-1 and is *not*  
416 hyperactive hinting that release of SNX-1 maybe an important part of the activation cycle of  
417 RME-8.

418

419 Results are also different when large portions of the C-terminal regions encompassing IWN3 are

420 fully deleted, a situation where we expect that RME-8 also cannot bind to SNX-1 or self-  
421 oligomerize. In this case we do observe spreading of nonfunctional RME-8 around the  
422 endosome (Figure 9C). This difference between the IWN3\* point mutation and full domain  
423 deletion indicates another essential function of RME-8 sequences after the DNAJ domain  
424 beyond autoinhibition.

425

426 In addition to stimulating Hsc70 ATPase activity, substrate binding is a typical function of DNAJ  
427 domain proteins. Because DNAJ-domain cochaperones typically act as cargo adapters for  
428 Hsc70, the RME-8 C-terminus is likely binding Hsc70 substrate(s). It is still unclear what the  
429 direct substrate of RME-8/Hsc70 is that controls the degradative microdomain. Candidate  
430 substrates include ESCRT-0 components HGRS-1/Hrs or STAM, Clathrin that associates with  
431 ESCRT-0, or other associated molecules, but clear identification of the key substrate awaits  
432 further studies.

433

434 New data presented in this work, along with published observations on RME-8 siRNA  
435 phenotypes in mammalian cells, also suggests that SNX-1 itself is a good candidate to be a  
436 substrate for RME-8/Hsc70 chaperone activity. Observations as to the importance of RME-8 for  
437 control of endosomal SNX-1 has been previously reported by Freeman et al. [34]. This work  
438 showed that relatively static Snx1 coated endosomal tubules accumulated after treatment of  
439 HeLa cells with RME-8 siRNA. Consistent with these findings, we show that SNX-1 accumulates  
440 on endosomes in an *rme-8ts* mutant, a phenotype that is rescued by IWN3\* but not by defective  
441 RME-8 truncation transgenes (Figure 7). Additionally, FRAP analysis of SNX-1 positive  
442 endosomes shows that recovery of GFP::SNX-1 is dramatically slowed in the absence of RME-  
443 8 (figure 7). RME-8 activation by SNX-1 could be transient if the activation of the RME-8 DNAJ-  
444 domain ultimately terminates interaction of SNX-1 with RME-8, causing reversion of RME-8 to

445 the autoinhibited state (Figure 9). This strategy of activation of a powerful regulator tied to  
446 inactivation is a common theme in membrane trafficking. Indeed SNX-1 being required for RME-  
447 8 activation as well as a target of RME-8 disassembly activity could effectively localize the  
448 powerful Hsc70 activity to the proper place and time.

449

450 We envision the SNX-1/RME-8 network in the recycling microdomain as part of a larger system  
451 that acts to create and separate functional microdomains on endosomes, with likely feedback  
452 regulation going in both directions. More work will be required to understand how the protein  
453 complexes within microdomains act to balance the activities of the endosome to allow correct  
454 sorting of incoming molecules and rebalance such activities as loads and cargo types change  
455 over time. The *C. elegans* coelomocyte provides an excellent system to answer such questions.

456

## 457 **MATERIALS AND METHODS**

458

459 All *C. elegans* strains were derived originally from the wild-type Bristol strain N2. Worm cultures,  
460 genetic crosses, and other *C. elegans* husbandry were performed according to standard  
461 methods [38]. A complete list of strains used in this study can be found in Supplementary Table  
462 1.

463

### 464 **Yeast Two-Hybrid Mutagenesis Screen**

465 We used error prone PCR [38,39] of RME-8 cDNA encoding amino acids 1322-2279 (J-domain  
466 to C-terminus) in PDEST32™, followed by gap repair transformation. Mutagenized RME-8  
467 fragments were co-transformed with a gapped vector, that included 100 bp homology arms, into  
468 JDY27 yeast expressing SNX-1 amino acids 221-472 (BAR domain) in PDEST22™. JDY27 is a  
469 yeast strains that includes several genomic reporter genes dependent on the Y2H interaction,

470 including ADE-2 and LacZ color assays, as well as HIS-3 and URA-3 growth assays (ade2-  
471 101 trp1-901 leu2-3.112 his3 $\Delta$ 200 ura3-52 gal4 $\Delta$  gal80 $\Delta$  SPAL::URA3 LYS2::GAL1-HIS GAL2-  
472 ADE2 met2:GAL7-LacZ (or GAL1-LacZ) can1R alpha). Approximately 10,000 transformed yeast  
473 were then plated on SC-HIS-LEU-TRP media and allowed to grow for 3 days at 30°C. These  
474 colonies were then replica plated to selective media SC-HIS-LEU-TRP-URA and allowed to  
475 grow for 10 days at 30°C. The 104 colonies that displayed an initial URA+ phenotype were  
476 patched onto SC-HIS-LEU-TRP-URA and selected for robust growth after 3 days at 30°C. We  
477 then retransformed the plasmids recovered from these colonies into the JDY27 SNX-1 strain to  
478 ensure the URA+ phenotype was dependent on the RME-8 plasmid. 30 colonies were then  
479 sequenced for mutations in the 1322-2279 region. Most colonies had multiple mutations,  
480 therefore we chose the strongest URA+ colonies to pursue, introducing mutations singly into  
481 PDEST32 RME-8 plasmids by site directed mutagenesis. We identified mutations E1962K and  
482 N1966K from two different colonies and chose to pursue their function further.

483

#### 484 **Yeast transformation and plasmid recovery**

485 Yeast transformations were performed using cells grown in liquid 1x YPD overnight at 30°C.  
486 The pellet was then washed 1x with distilled water and resuspended in a solution of 0.1M LiOAc  
487 + 1x TE, at a 1:2 pellet size to buffer volume. 100ul of yeast slurry was then combined with 1 $\mu$ g  
488 of DNA and 10ul of denatured 10mg/ml salmon sperm DNA. Yeast were then incubated at 30°C  
489 for 30 minutes before adding 1ml 44% PEG + 0.1M LiOAc and 1x TE, after which it was allowed  
490 to incubate for another 30 minutes at 30°C. Following this, DMSO was added at a 1:10 ratio to  
491 the PEG, and yeast were heat shocked in a 42°C water bath for 13 minutes. After the heat  
492 shock, yeast were spun down in a microcentrifuge and resuspended in 50 $\mu$ L 5mM CaCl<sub>2</sub> before  
493 being plated onto selective media.

494

495 Yeast plasmid recovery performed using QIAprep Spin Miniprep Kit and a user adapted

496 Protocol by Michael Jones, Chugai Institute for Molecular Medicine, Ibaraki, Japan. Essentially a  
497 colony of yeast is resuspended in 250ul of P1 buffer combined with 100  $\mu$ l of acid-washed glass  
498 beads (Sigma G-8772) and vortexed for 5 min. The slurry is then used in the typical miniprep  
499 protocol, with the final eluate of the column used to transform bacteria for amplification of the  
500 plasmid DNA.

501

### 502 **Homology searches**

503 We used the NCBI BLAST to probe the over 4000 proteomes in the NCBI database for the  
504 existence of DNA J proteins that also contained IWN repeats. We used the *C. elegans* RME-8  
505 amino acid sequence and the default BLAST algorithm to probe each taxonomic group for an  
506 RME-8 homolog. We filtered the results with a coverage threshold of >40% and e value < .001.  
507 We then hand curated each positive to ensure that it contained IWN repeats defined by I/L/V W  
508  $\zeta$   $\zeta$ , all of the hits with at least 40% coverage contained at least three of the IWN repeats.

509

### 510 **Display of tree of life**

511 To display the phylogenetic conservation of RME-8 we used iTOL version 5.7 [40] which is  
512 based on Tree of Life v1.0 [41].

513

### 514 **Single Copy MiniMos transgenes**

515 Plasmids for *C. elegans* coleomocyte expression were produced by standard methods including  
516 *in vitro* recombination via the Gateway system (ThermoFisher) and/or Gibson Assembly using  
517 the Nebuilder system (NEB). Plasmid backbones were pCFJ1662 and pCFJ910 (Addgene) and  
518 used promoters from the *snx-1* or *cup-4* genes. Our minimos protocol for single copy transgene  
519 integration is based on a protocol found on wormbuilder.org as described in [42]. The gonad  
520 arms of first day gravid adults were microinjected with plasmid mixtures including 10ng/ul drug  
521 resistant expression plasmid (G418 or Hygromycin) [43,44] 10ng/ $\mu$ l pGH8, 2.5ng/ $\mu$ l pCFJ90,

522 65ng/μl, and 10ng/ul pCFJ601. 2-3 injected animals per plate were incubated at 25°C, with  
523 selection drug added between 24-72 hrs post injection. Plates were screened for single copy  
524 integrated transformants after a minimum of 10 days of growth, focused on populations that  
525 survive drug selection and lack extrachromosomal arrays visualized with the mCherry co-  
526 injection markers. Candidate single-copy integrants were passaged on drug containing plates  
527 and analyzed for expression. Lines displaying 100% transmission of the expressed transgene  
528 without drug selection were frozen and used for experiments.

529

### 530 **Microscopy and image analysis**

531 Live animals were mounted on 10% agarose pads and immobilized using 0.1μm polystyrene  
532 microspheres (Polysciences 00876-15) [45]. Multiwavelength fluorescence Z-series with 0.2  
533 micron step size were obtained using a SOLA SE 365 Solid state light engine, Axiovert 200M  
534 (Carl Zeiss MicroImaging) microscope equipped with a digital CCD camera (QImaging; Rolera  
535 EM-C2), or Axio Observer (Carl Zeiss MicroImaging) microscope equipped with a scientific  
536 sCMOS camera (Photometrics Prime 95B), captured using MetaMorph 7.7 software (Universal  
537 Imaging) and then deconvolved using AutoDeblur X3 software (AutoQuant Imaging).  
538 Colocalization analysis was done using MetaMorph 7.7 colocalization plugin, whereby  
539 intensities in each channel were thresholded and Pearson's correlation was analyzed. Intensity  
540 measurements were also analyzed by MetaMorph 7.7, using thresholded images captured  
541 under identical acquisition parameters. FRAP was done as described in [9]

542

### 543 **Graphing and statistics**

544 Results were all graphed using GraphPad Prism 8.4.3 software and significance was measured  
545 by one-way ANOVA or students t-test.

546

547

548

549

550 [1] Grant B, Hirsh D: **Receptor-mediated Endocytosis in the *Caenorhabditis elegans***  
551 **Oocyte**. MBoC 1999, 10: 4311-4326.

552 [2] Zhang Y, Grant B, Hirsh D: **RME-8, a conserved J-domain protein, is required for**  
553 **endocytosis in *Caenorhabditis elegans***. Mol.Biol.Cell 2001, 12: 2011-2021.

554 [3] Silady RA, Ehrhardt DW, Jackson K, Faulkner C, Oparka K, Somerville CR: **The**  
555 **GRV2/RME-8 protein of *Arabidopsis* functions in the late endocytic pathway and is**  
556 **required for vacuolar membrane flow**. The Plant Journal 2008, 53: 29-41.

557 [4] Chang HC, Hull M, Mellman I: **The J-domain protein Rme-8 interacts with Hsc70 to**  
558 **control clathrin-dependent endocytosis in *Drosophila***. Journal of Cell Biology 2004, 164:  
559 1055-1064.

560 [5] Girard M, McPherson PS: **RME-8 regulates trafficking of the epidermal growth factor**  
561 **receptor**. FEBS Letters 2008, 582: 961-966.

562 [6] Xhabija B, Taylor GS, Fujibayashi A, Sekiguchi K, Vacratsis PO: **Receptor mediated**  
563 **endocytosis 8 is a novel PI(3)P binding protein regulated by myotubularin-related 2**.  
564 FEBS Lett. 2011, 585: 1722-1728.

565 [7] Girard M, Poupon V, Blondeau F, McPherson PS: **The DnaJ-domain protein RME-8**  
566 **functions in endosomal trafficking**. J.Biol.Chem. 2005, 280: 40135-40143.

567 [8] Fujibayashi A, Taguchi T, Misaki R, Ohtani M, Dohmae N, Takio K, Yamada M, Gu J,  
568 Yamakami M, Fukuda M, et al.: **Human RME-8 is involved in membrane trafficking through**  
569 **early endosomes**. Cell Struct.Funct. 2008, 33: 35-50.

- 570 [9] Shi A, Sun L, Banerjee R, Tobin M, Zhang Y, Grant BD: **Regulation of endosomal clathrin**  
571 **and retromer-mediated endosome to Golgi retrograde transport by the J-domain protein**  
572 **RME-8**. EMBO J. 2009, 28: 3290-3302.
- 573 [10] Norris A, Tammineni P, Wang S, Gerdes J, Murr A, Kwan KY, Cai Q, Grant BD: **SNX-1 and**  
574 **RME-8 oppose the assembly of HGRS-1/ESCRT-0 degradative microdomains on**  
575 **endosomes**. Proc.Natl.Acad.Sci.U.S.A. 2017, 114: E307-E316.
- 576 [11] Norris A, Grant BD: **Endosomal microdomains: Formation and function**. Current opinion  
577 in cell biology 2020, 65: 86-95.
- 578 [12] Seaman MN, Harbour ME, Tattersall D, Read E, Bright N: **Membrane recruitment of the**  
579 **cargo-selective retromer subcomplex is catalysed by the small GTPase Rab7 and**  
580 **inhibited by the Rab-GAP TBC1D5**. J.Cell.Sci. 2009, 122: 2371-2382.
- 581 [13] Liu T, Gomez TS, Sackey BK, Billadeau DD, Burd CG: **Rab GTPase regulation of**  
582 **retromer-mediated cargo export during endosome maturation**. Molecular biology of the cell  
583 2012, 23: 2505-2515.
- 584 [14] Rojas R, van Vlijmen T, Mardones GA, Prabhu Y, Rojas AL, Mohammed S, Heck AJR,  
585 Raposo G, van der Sluijs P, Bonifacino JS: **Regulation of retromer recruitment to**  
586 **endosomes by sequential action of Rab5 and Rab7**. Journal of Cell Biology 2008, 183: 513-  
587 526.
- 588 [15] Seaman MNJ: **The retromer complex - endosomal protein recycling and beyond**.  
589 Journal of cell science 2012, 125: 4693-4702.
- 590 [16] Vilariño-Güell C, Rajput A, Milnerwood AJ, Shah B, Szu-Tu C, Trinh J, Yu I, Encarnacion M,  
591 Munsie LN, Tapia L, et al.: **DNAJC13 mutations in Parkinson disease**. Human molecular  
592 genetics 2014, 23: 1794-1801.



- 593 [17] Rajput A, Ross,JP, Bernales,CQ, Rayaprolu,S, Soto-Ortolaza,AI, Ross,OA, Gerpen,Jv,  
594 Uitti,RJ, Wszolek,ZK, Rajput,AH, Vilariño-Güell,C: Short report. Social Wellbeing Agency, Toi  
595 Hau Tāngata; 2020.
- 596 [18] Cullen PJ, Steinberg F: **To degrade or not to degrade: mechanisms and significance of**  
597 **endocytic recycling**. Nat.Rev.Mol.Cell Biol. 2018, 19: 679-696.
- 598 [19] Zarouchlioti C, Parfitt DA, Li W, Gittings LM, Cheetham ME: **DNAJ Proteins in**  
599 **neurodegeneration: essential and protective factors**. Philosophical Transactions of the  
600 Royal Society B: Biological Sciences 2018, 373: 20160534.
- 601 [20] Hasegawa T, Yoshida S, Sugeno N, Kobayashi J, Aoki M: **DnaJ/Hsp40 Family and**  
602 **Parkinson's Disease**. Front. Neurosci. 2018, 11.
- 603 [21] Kampinga HH, Craig EA: **The Hsp70 chaperone machinery: J-proteins as drivers of**  
604 **functional specificity**. Nat Rev Mol Cell Biol 2010, 11: 579-592.
- 605 [22] Silver PA, Way JC: **Eukaryotic DnaJ homologs and the specificity of Hsp70 activity**.  
606 Cell 1993, 74: 5-6.
- 607 [23] Qiu X-, Shao Y-, Miao S, Wang L: **The diversity of the DnaJ/Hsp40 family, the crucial**  
608 **partners for Hsp70 chaperones**. Cell Mol Life Sci 2006, 63: 2560-2570.
- 609 [24] Kityk R, Kopp J, Mayer MP: **Molecular Mechanism of J-Domain-Triggered ATP**  
610 **Hydrolysis by Hsp70 Chaperones**. Molecular Cell 2018, 69: 227-237.e4.
- 611 [25] Mayer M, Bukau B: **Hsp70 chaperones: Cellular functions and molecular mechanism**.  
612 CMLS, Cell. Mol. Life Sci 2005, 62: 670-684.
- 613 [26] Genevaux P, Georgopoulos C, Kelley WL: **The Hsp70 chaperone machines of**  
614 **Escherichia coli: a paradigm for the repartition of chaperone functions**. Molecular  
615 Microbiology 2007, 66: 840-857.

- 616 [27] Lindquist S, Craig EA: **The Heat-Shock Proteins**. Annual Review of Genetics 1988, 22:  
617 631-677.
- 618 [28] Gupta RS, Singh B: **Cloning of the HSP70 gene from Halobacterium marismortui:**  
619 **relatedness of archaeobacterial HSP70 to its eubacterial homologs and a model for the**  
620 **evolution of the HSP70 gene**. J Bacteriol 1992, 174: 4594-4605.
- 621 [29] Xhabija B, Vacratsis PO: **Receptor-mediated Endocytosis 8 Utilizes an N-terminal**  
622 **Phosphoinositide-binding Motif to Regulate Endosomal Clathrin Dynamics**. J Biol Chem  
623 2015, 290: 21676-21689.
- 624 [30] Poteryaev D, Fares H, Bowerman B, Spang A: **Caenorhabditis elegans SAND-1 is**  
625 **essential for RAB-7 function in endosomal traffic**. The EMBO Journal 2007, 26: 301-312.
- 626 [31] Kityk R, Kopp J, Mayer MP: **Molecular Mechanism of J-Domain-Triggered ATP**  
627 **Hydrolysis by Hsp70 Chaperones**. Molecular cell 2018, 69: 227-237.e4.
- 628 [32] Genevaux P, Schwager F, Georgopoulos C, Kelley WL: **Scanning Mutagenesis Identifies**  
629 **Amino Acid Residues Essential for the in Vivo Activity of the Escherichia coli DnaJ**  
630 **(Hsp40) J-Domain**. Genetics 2002, 162: 1045-1053.
- 631 [33] Szyperski T, Pellicchia M, Wall D, Georgopoulos C, Wüthrich K: **NMR structure**  
632 **determination of the Escherichia coli DnaJ molecular chaperone: secondary structure**  
633 **and backbone fold of the N-terminal region (residues 2-108) containing the highly**  
634 **conserved J domain**. PNAS 1994, 91: 11343-11347.
- 635 [34] Ahmad A, Bhattacharya A, McDonald RA, Cordes M, Ellington B, Bertelsen EB, Zuiderweg  
636 ERP: **Heat shock protein 70 kDa chaperone/DnaJ cochaperone complex employs an**  
637 **unusual dynamic interface**. PNAS 2011, 108: 18966-18971.

- 638 [35] Freeman CL, Hesketh G, Seaman MNJ: **RME-8 coordinates the activity of the WASH**  
639 **complex with the function of the retromer SNX dimer to control endosomal tubulation.**  
640 Journal of cell science 2014, 127: 2053-2070.
- 641 [36] Zhang J, Liu J, Norris A, Grant BD, Wang X: **A novel requirement for ubiquitin-**  
642 **conjugating enzyme UBC-13 in retrograde recycling of MIG-14/Wntless and Wnt**  
643 **signaling.** Molecular biology of the cell 2018, 29: 2098-2112.
- 644 [37] Jumper J, Evans R, Pritzel A, Green T, Figurnov M, Ronneberger O, Tunyasuvunakool K,  
645 Bates R, Žídek A, Potapenko A, et al.: **Highly accurate protein structure prediction with**  
646 **AlphaFold.** Nature (London) 2021, 596: 583-589.
- 647 [38] Brenner S: **The Genetics of CAENORHABDITIS ELEGANS.** Genetics 1974, 77: 71-94.
- 648 [39] Wilson DS, Keefe AD: **Random Mutagenesis by PCR.** Current Protocols in Molecular  
649 Biology 2000, 51: 8.3.1-8.3.9.
- 650 [40] Letunic I, Bork P: **Interactive Tree Of Life (iTOL) v4: recent updates and new**  
651 **developments.** Nucleic Acids Research 2019, 47: W256-W259.
- 652 [41] Ciccarelli FD, Doerks T, von Mering C, Creevey CJ, Snel B, Bork P: **Toward automatic**  
653 **reconstruction of a highly resolved tree of life.** Science 2006, 311: 1283-1287.
- 654 [42] Frøkjær-Jensen C, Davis MW, Sarov M, Taylor J, Flibotte S, LaBella M, Pozniakovsky A,  
655 Moerman DG, Jorgensen EM: **Random and targeted transgene insertion in Caenorhabditis**  
656 **elegans using a modified Mos1 transposon.** Nat Methods 2014, 11: 529-534.
- 657 [43] Giordano-Santini R, Milstein S, Svrzikapa N, Tu D, Johnsen R, Baillie D, Vidal M, Dupuy D:  
658 **An antibiotic selection marker for nematode transgenesis.** Nat Methods 2010, 7: 721-723.
- 659 [44] Lehner B, Garcia-Verdugo R, Semple JI: **Rapid selection of transgenic C. elegans using**  
660 **antibiotic resistance.** Nature methods 2010, 7: 725-727.

661 [45] Kim E, Sun L, Gabel CV, Fang-Yen C: **Long-Term Imaging of *Caenorhabditis elegans***  
662 **Using Nanoparticle-Mediated Immobilization.** PLoS ONE 2013, 8: 53419.

663

664

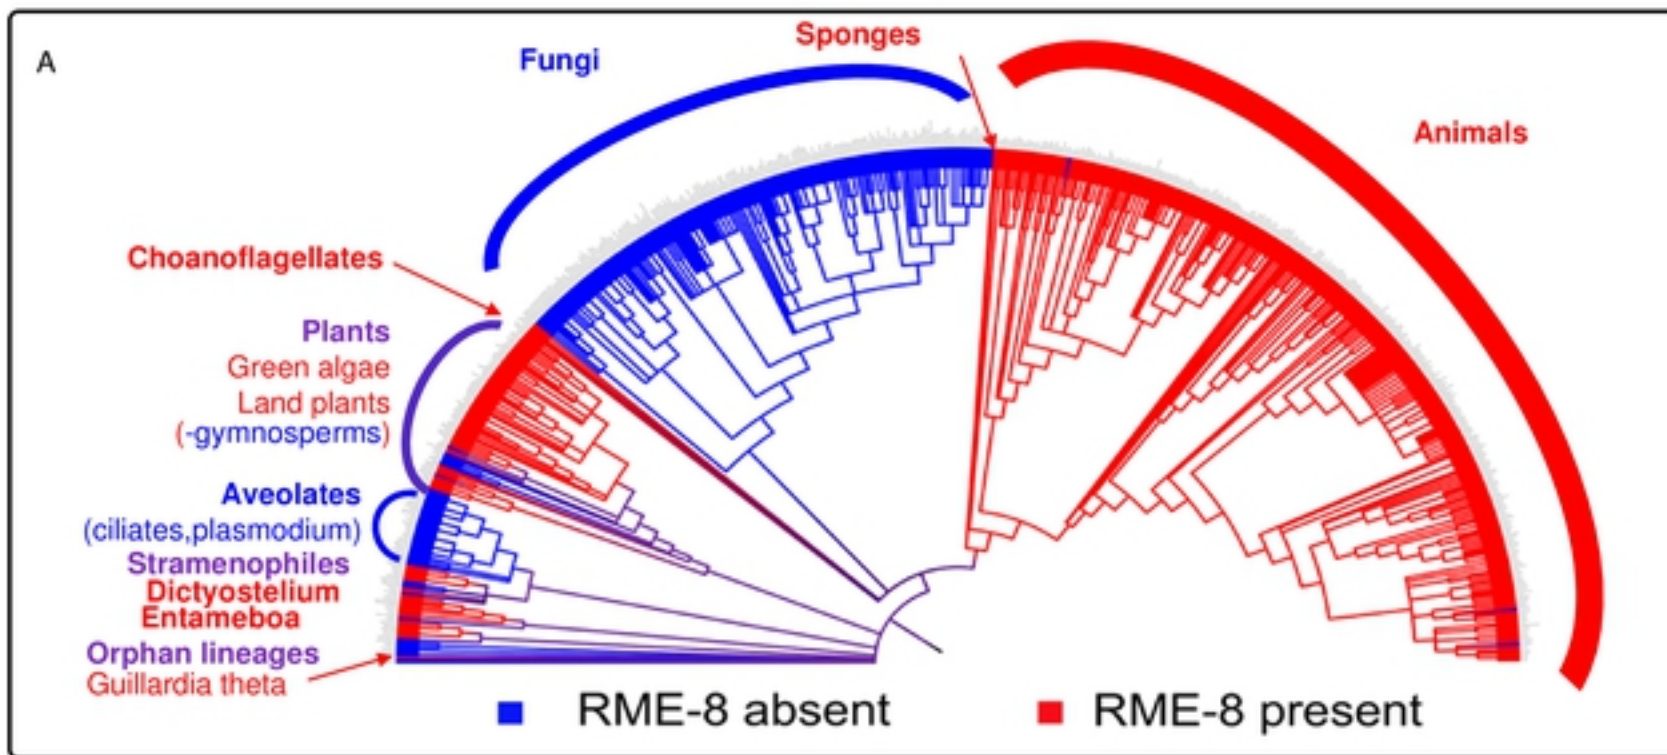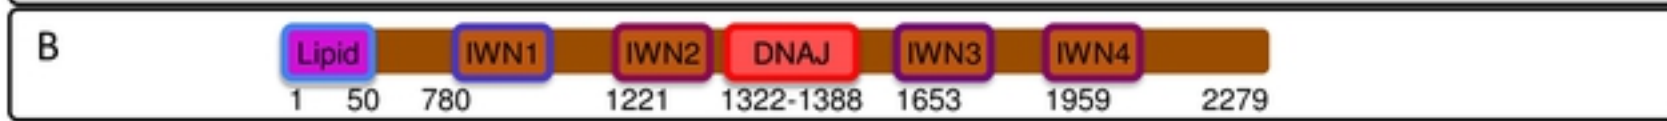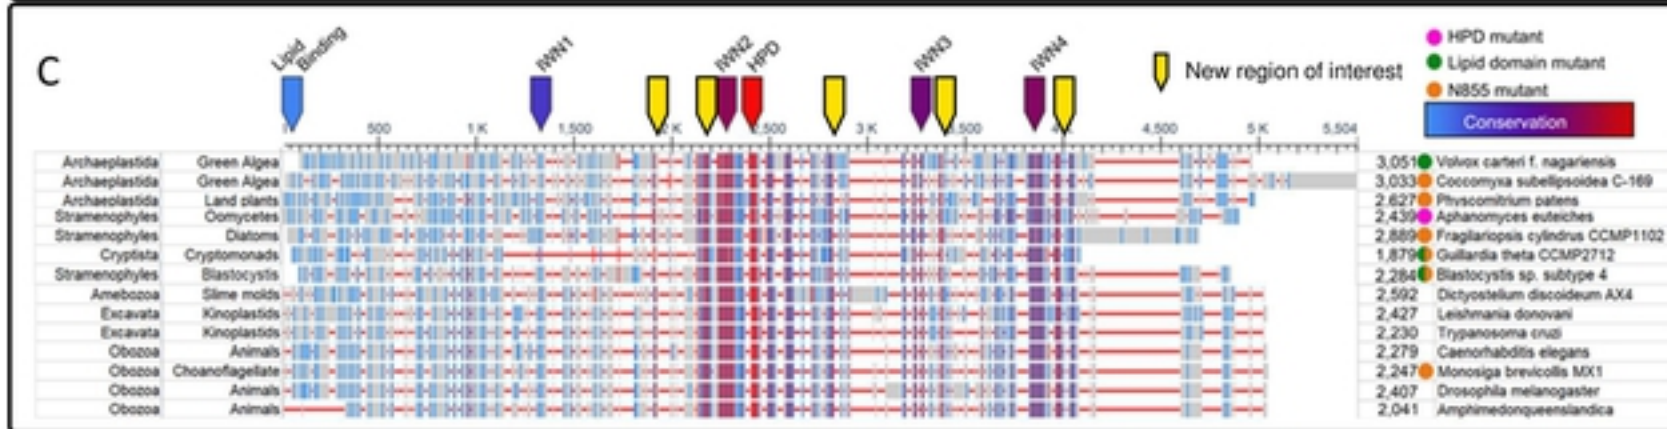

**Figure 1. RME-8 homologs are found dispersed throughout Eukarya.** (A) A phylogram of Eukarya generated in iTOL, (see methods). Branches containing an RME-8 homolog are indicated in red, nodes containing branches with RME-8 homologs present and absent are colored in purple, and branches or nodes containing no RME-8 homologs are colored in blue. (B) A schematic of RME-8 with key domains indicated. (C) An alignment of a sampling of RME-8 homologs from dispersed branches in Eukarya generated by the NCBI Multiple Sequence Alignment (MSA) viewer. The names of the phylogenetic categories are indicated to the left, and species names are indicated to the right of the MSA. Colored dots indicating mutations in key domains are indicated to the left of the species name. A pink dot indicates that key residues in the DNAJ domain are mutated. A green dot indicates the key W20 (human) residue in the originally proposed lipid binding domain is absent, and an orange dot indicates the Parkinson's associated residue N855 (human) is not conserved. In the MSA, red horizontal lines represent gaps, grey bars represent minimal homology, blue bars represent low homology and red indicates high homology. Arrows above the alignment indicate key areas of interest, known regions of interest are colored based on their homology, new regions of interest are indicated by yellow arrows.

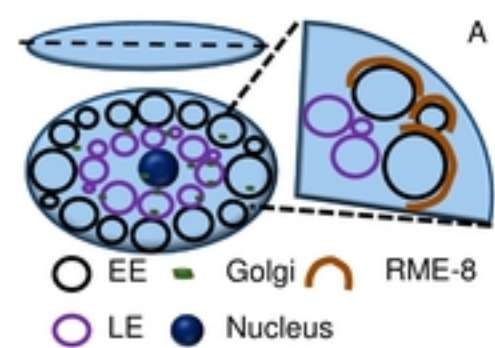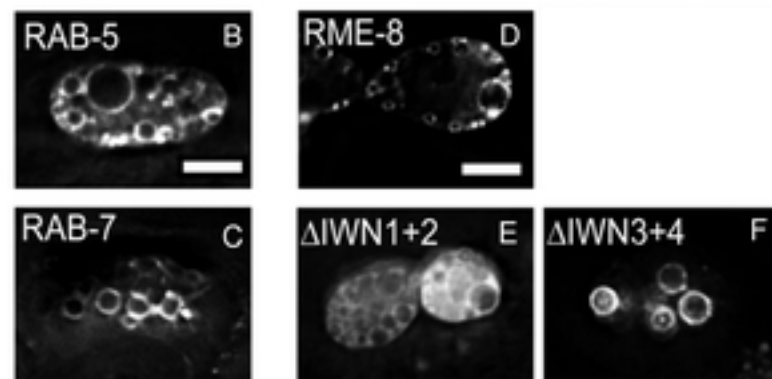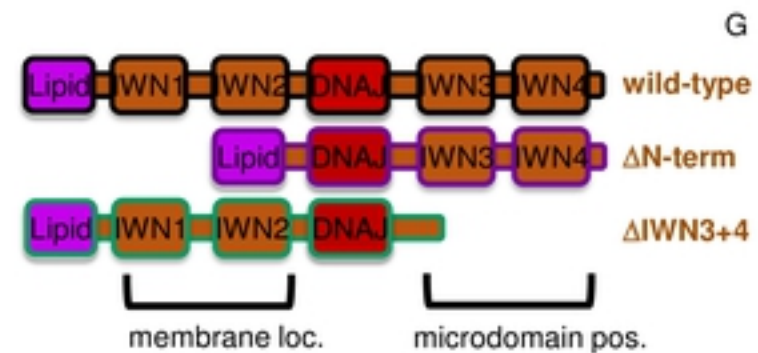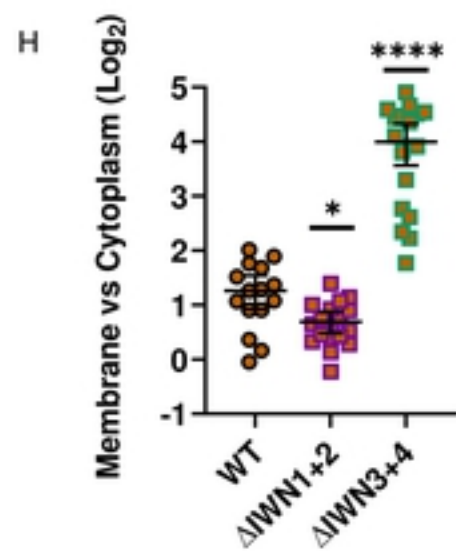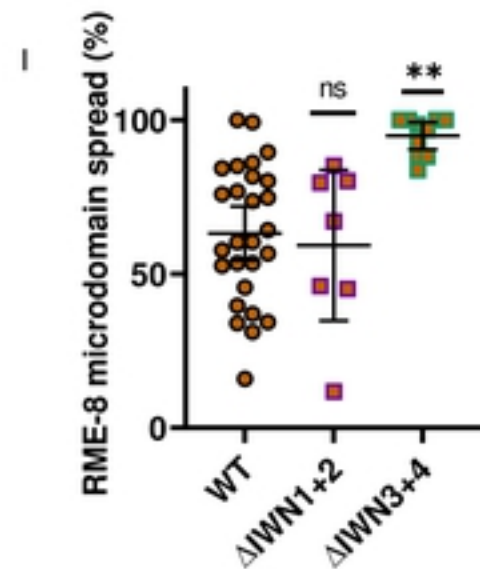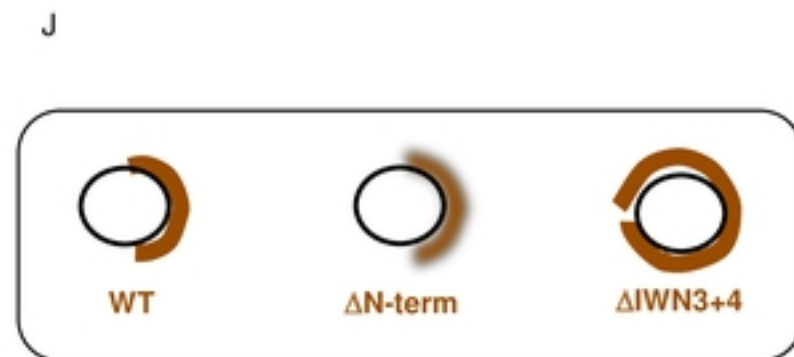

**Figure 2. The RME-8 N-terminus controls membrane association, while the C-terminus controls microdomain positioning, and microdomain spread.** (A) Early endosomes (EE), Late endosomes (LE), Golgi, and the Nucleus occupy stereotypical positions in the coelomocyte cell. (B-C) Micrograph of tagRFP::RAB-5 (B) and tagRFP::RAB-7 (C) expressed in coelomocytes. (D-F) Micrograph of pSNX-1::GFP::RME-8 expressed in wild-type animals. Micrograph of pSNX-1::GFP::RME-8 N-terminal (E) and C-terminal truncations (F). (G) Illustration of wild-type, N-terminal and C-terminal truncations of RME-8. (H) Diagram of the coelomocyte segmented into peripheral and internal portions, and the calculation of the ratio of interior intensity to peripheral intensity. (J) Ratio of the GFP::RME-8 intensity in the cytoplasm versus on the membrane in the indicated GFP::RME-8 wild-type and truncations. The values are also plotted on a Log<sub>2</sub> scale. (K) Quantification of the percentage of an endosome covered by the indicated GFP-RME-8 wild-type and truncation mutants. All micrographs are deconvolved widefield images (see methods). In I-K each data point is an individual worm, error bars indicate Mean with 95% CI, ANOVA statistical analysis done in Graphpad Prism with  $p < 0.5 = *$ ,  $p < 0.01 = **$ ,  $p < 0.001 = ***$ ,  $p < 0.0001 = ****$ . Scale bars are 5 microns in whole coelomocyte images.

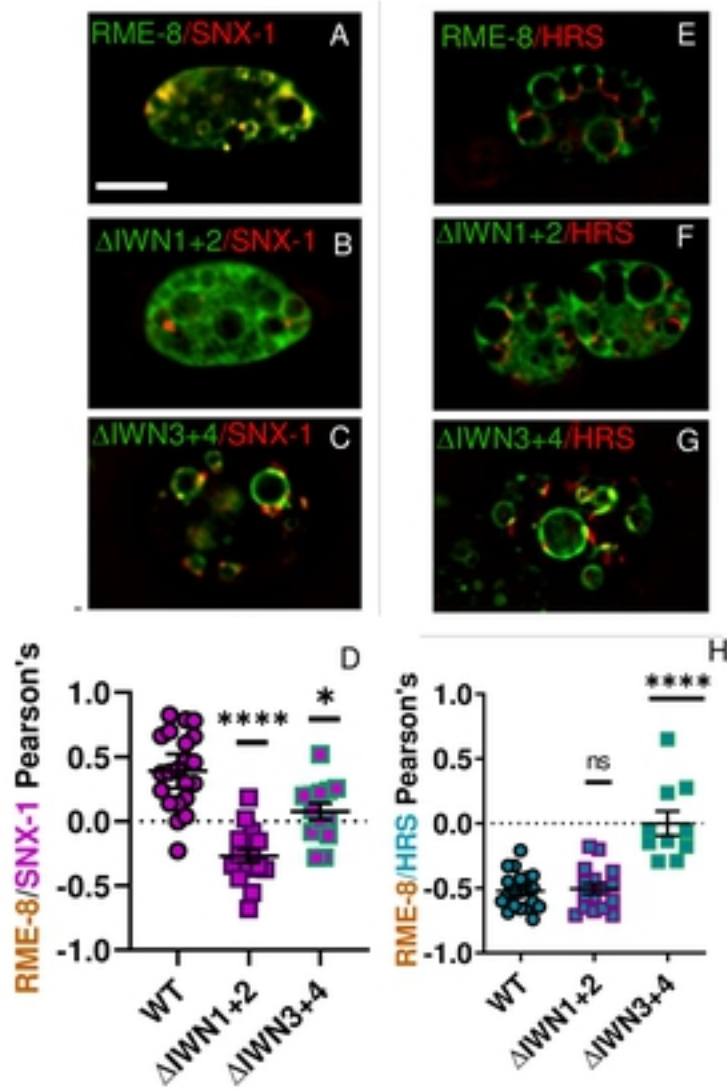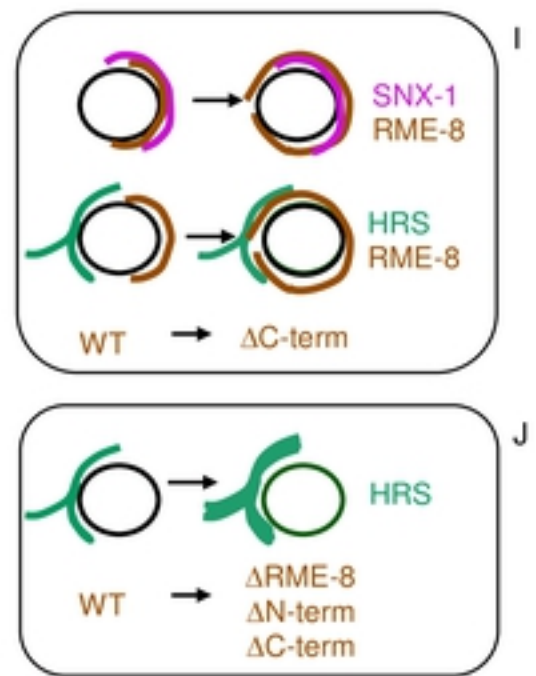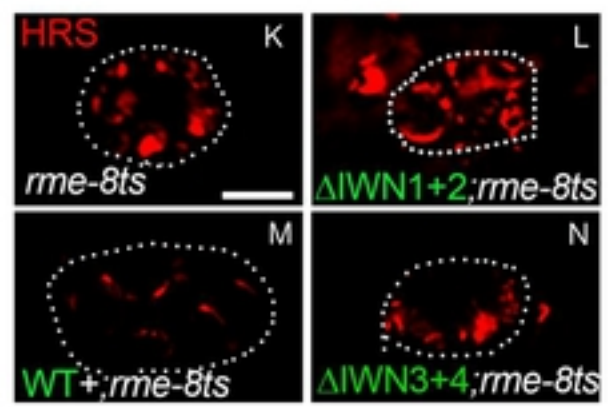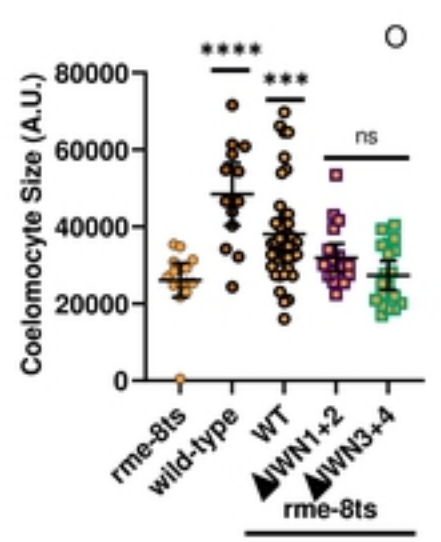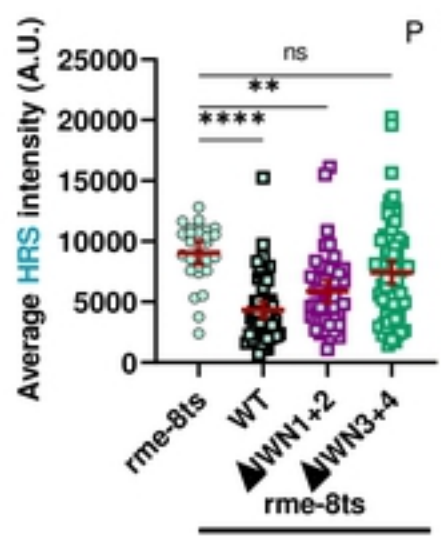



Figure 3. RME-8 C-terminal regions mediate its recycling versus degradative domain segregation. Both N-terminal and C-terminal regions are important for HRS (HGRS-1) uncoating activity. (A-C) Micrograph of pCUP-4::GFP::RME-8 wild-type, N-terminal, and C-terminal truncations co-expressed with tagRFP::SNX-1 in coelomocytes of wild-type animals. (D) Quantification of colocalization of pCUP-4::GFP::RME-8 wild-type and truncations with tagRFP::SNX-1 in coelomocytes of wild-type animals. (E-G) Micrograph of pCUP-4::GFP::RME-8 wild-type, N-terminal, and C-terminal truncations co-expressed with tagRFP::HRS (HGRS-1) in coelomocytes of wild-type animals. (H) Quantification of colocalization of GFP::RME-8 wild-type and truncations with tagRFP::SNX-1 in wild-type animals. (I) Illustration of the microdomain segregation that is disrupted when IWN3 and IWN4 regions are deleted in RME-8. (J) Illustration of the accumulation of HRS (HGRS-1) that occurs in the absence of RME-8, and N-terminal and C-terminal deletions. (O) Quantification of coelomocyte size in *rme-8ts* mutant animals expressing ectopic RME-8+, N-terminal, or C-terminal truncations. (P) Quantification of tagRFP-HRS/HGRS-1 average intensity in *rme-8ts* animals expressing pCUP-4::GFP::RME-8+, N-terminal, or C-terminal truncations. Each data point is an individual worm, error bars indicate Mean with 95% CI, ANOVA statistical analysis done in Prism with  $p < 0.5 = *$ ,  $p < 0.01 = **$ ,  $p < 0.001 = ***$ ,  $p < 0.0001 = ****$ . Scale bars are 5 microns in whole coelomocyte images.

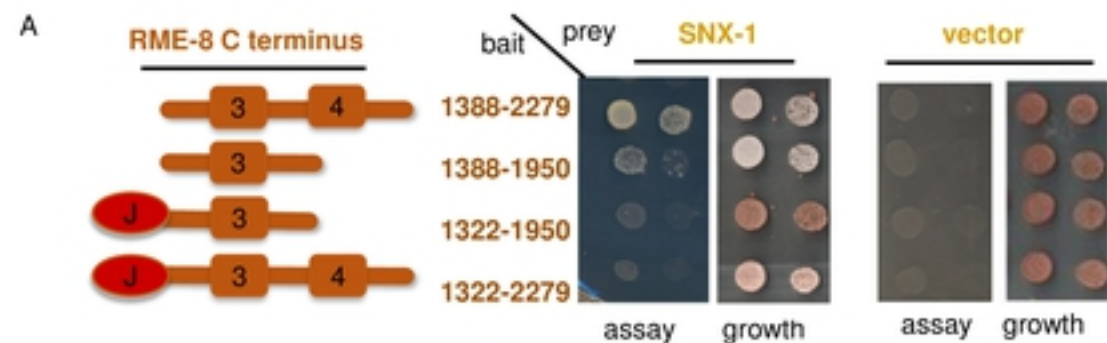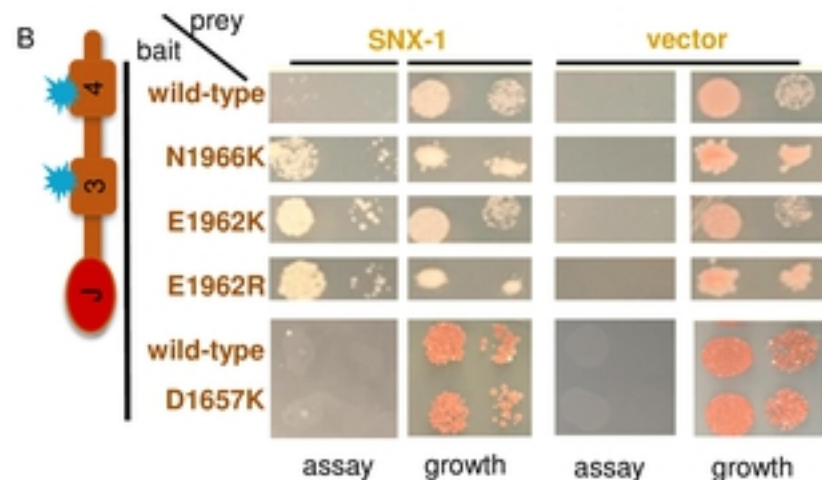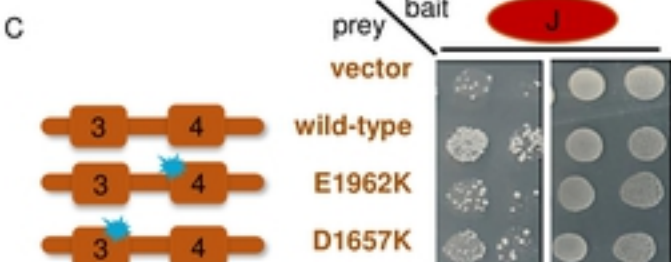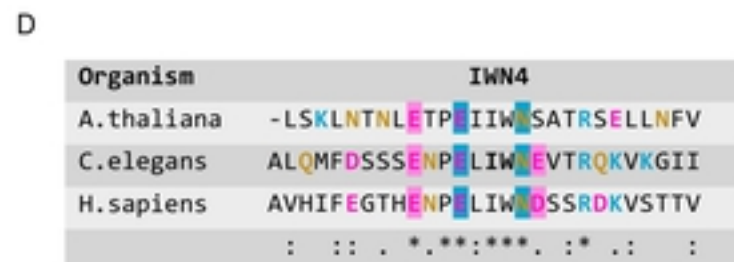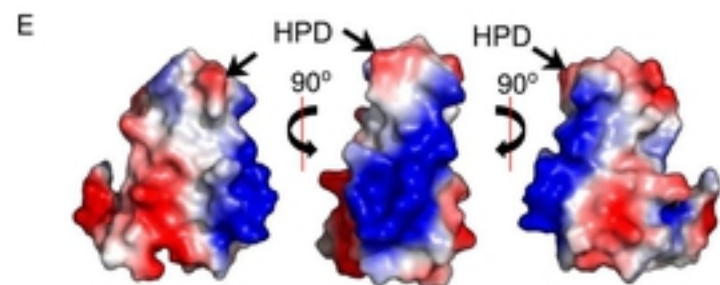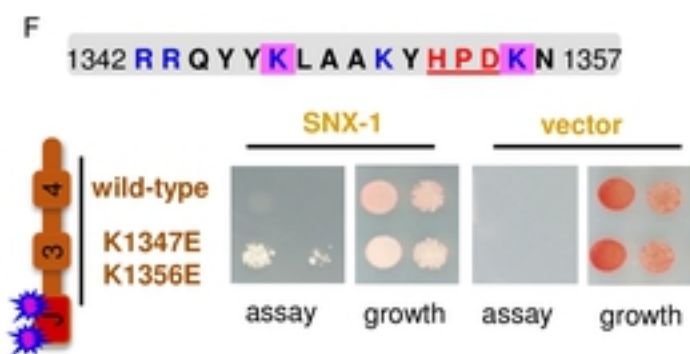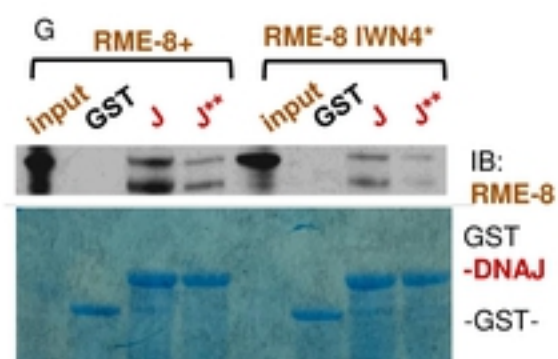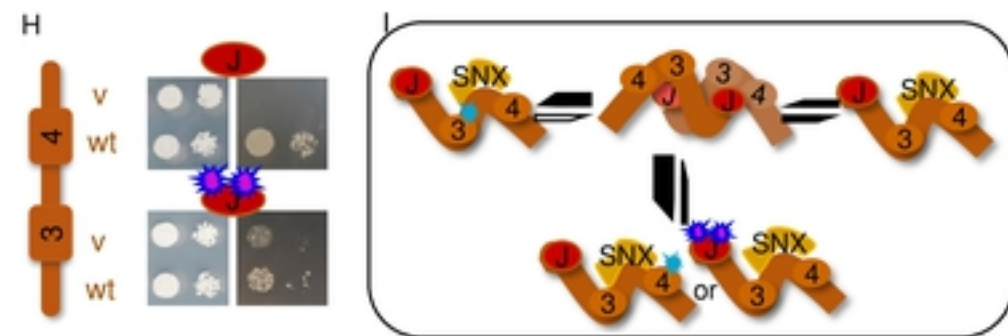

**Figure 4. The RME-8 DNAJ , IWN4, and IWN3 domains mediate SNX-1 and RME-8 self-interactions.** (A) SNX-1 (aa221-472) expressed in pDEST22™ tested for interaction with empty vector or fragments of the RME-8 C-terminus expressed in pDEST32™ using JDY27 containing URA3, ADE2, and HIS3 reporter genes. 5ul of suspended yeast at 1, and 0.1 OD's were spotted on SC-LEU-TRP growth or SC-LEU-TRP-URA assay media. A schematic representation of the RME-8 fragments tested are illustrated to the left of the yeast two hybrid assay. (B) PCR mutagenesis of the RME-8 (DNAJ-end) fragment yielded two mutants in IWN4. Both mutations were lysine substitutions at Glutamic Acid 1955 and Asparagine 1966, that enabled an RME-8(C-term)/SNX-1(BAR) growth on the stringent assay media SC-LEU-TRP-URA. An arginine substitution at position 1962 did not enabled growth on the stringent assay media SC-LEU-URA. A schematic of the RME-8 fragment is illustrated to the left of the assay. 5ul of suspended yeast at 0.5 and 0.05 OD's were spotted on SC-LEU-TRP growth or SC-LEU-TRP (-URA or +20mM 3AT) assay media. (C) Fragments of RME-8 C-terminus (no DNAJ) in the Duplex LexA™ 2-micron yeast two hybrid system were tested for their ability to interact with the DNAJ domain (1322-1388). 5ul of suspended yeast at 2, 0.2, and 0.02 OD's were spotted on SC-HIS-URA-TRP growth or SC GAL-HIS-TRP-LEU SC assay media. IWN3 and IWN4 mutants of the C-terminus displayed diminished interaction compared to wild-type. The isolated IWN4 fragment displayed similar growth to full length. A schematic of the mutants and fragments are illustrated to the left of the assay. (D) alignment of IWN4 from *C. elegans*, *H. sapiens* and *A. thaliana*. RME-8 E1962 and N1966 found in the screen are highlighted with blue. Additional acidic residues are highlighted in pink. (E) Three views of an electrostatic representation of the RME-8 DNAJ domain threaded onto PDB file 2OCH. Blue indicates basic, and red indicates acidic surfaces. The HPD catalytic triad of DNAJ domains is indicated by arrows. The center image displays the basic nature of helix II of the DNAJ domain. (F) Lysines and Arginines of helix II were targeted for doped oligo mutagenesis and selected for increased interaction with SNX-1. The two lysines identified by the screen are highlighted in pink. The red underline indicates residues that were identified by Ahmad et al 2011 to be defective in DNAJ/DNAK(Hsc70) interactions. The aa1322-2279 fragment with lysines at position 1347 and 1356 substituted with glutamic acid was sufficient to show growth on assay media when combined with SNX-1 BAR domain. A schematic of the Fragment mutated represented to the left of the assay. 5ul of suspended yeast at 1, and 0.1 OD's were spotted on SC-LEU-TRP growth or SC-LEU-TRP-URA assay media. (G) Fragments of HA-tagged RME-8 C-terminus (no DNAJ) wild-type and IWN4\* expressed in an in vitro TnT™ system were incubated with DNAJ-GST or DNAJ\*(K1347E/K1356E)-GST Sepharose beads. The bound fraction was run on an SDS-PAGE gel and probed with an HA-antibody. The incubation reaction was also run on a separate gel and stained with Coomassie Blue to indicate the amount of GST-tagged DNAJ domain. DNAJ\*\* disrupted the RME-8/DNAJ interaction. (H). The aa1322-1388 (DNAJ) fragment with lysines at position 1347 and 1356 substituted with glutamic acid disrupted the RME-8/DNAJ interaction. A schematic of the Fragment mutated represented to the left of the assay. 5ul of suspended yeast at 1, and 0.1 OD's were spotted on SC-LEU-TRP growth or SC-LEU-TRP-URA assay media. (I) An illustration of our hypothesis that mutations in DNAJ, IWN4, and IWN3 disrupt RME-8 self-interaction.

**Figure S4. Supplement to Figure 5.** Empty vector or SNX-1 (aa221-472) expressed in pDEST22™ tested for interaction with of the RME-8 C-terminus with our without its DNAJ domain, and mutants isolated in the screen. The RME-8 fragments were expressed in pDEST32™ using JDY27 containing URA3, ADE2, and HIS3 reporter genes. 5ul of suspended yeast at 1, and 0.1 OD's were spotted on SC-LEU-TRP growth, or assay plates with increasing stringency; SC-LEU-TRP-HIS, SC-LEU-TRP-HIS+25mM 3AT, and SC-LEU-TRP-URA. A schematic representation of the RME-8 fragments tested are illustrated to the left of the yeast two hybrid assay.

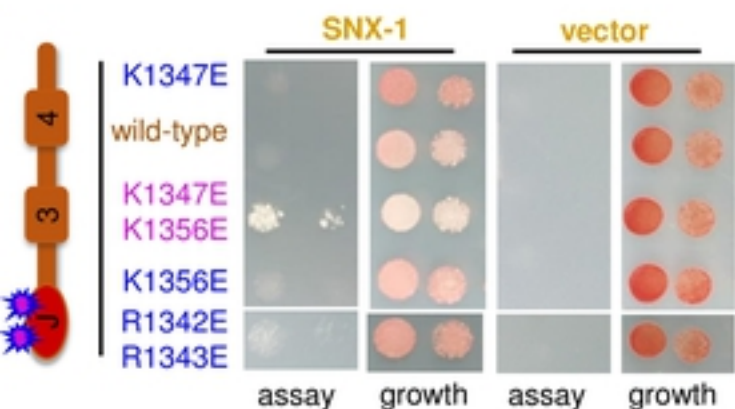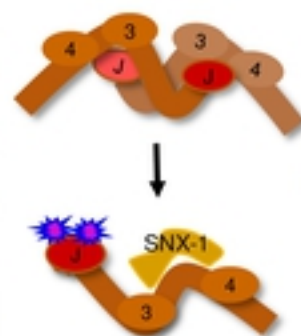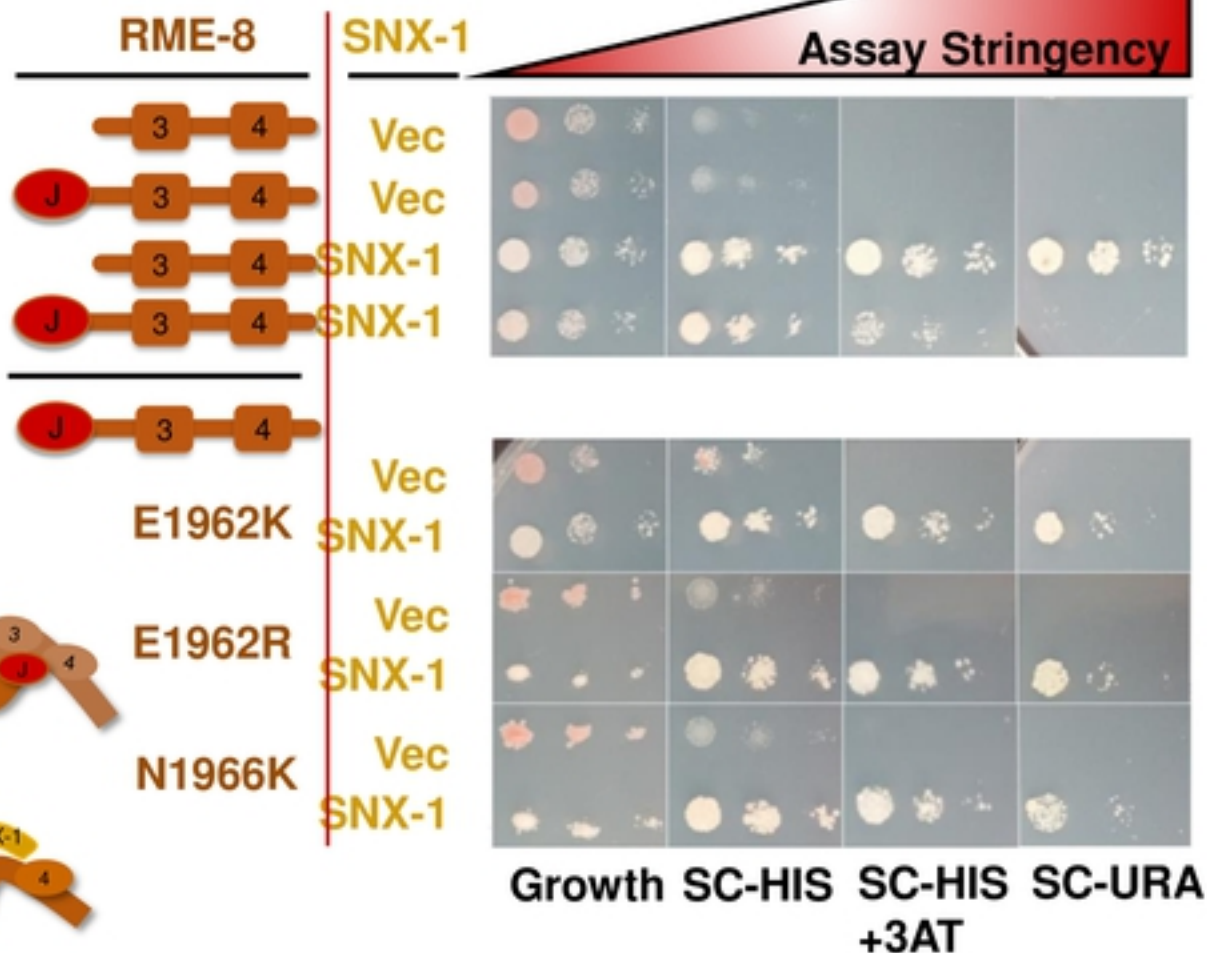

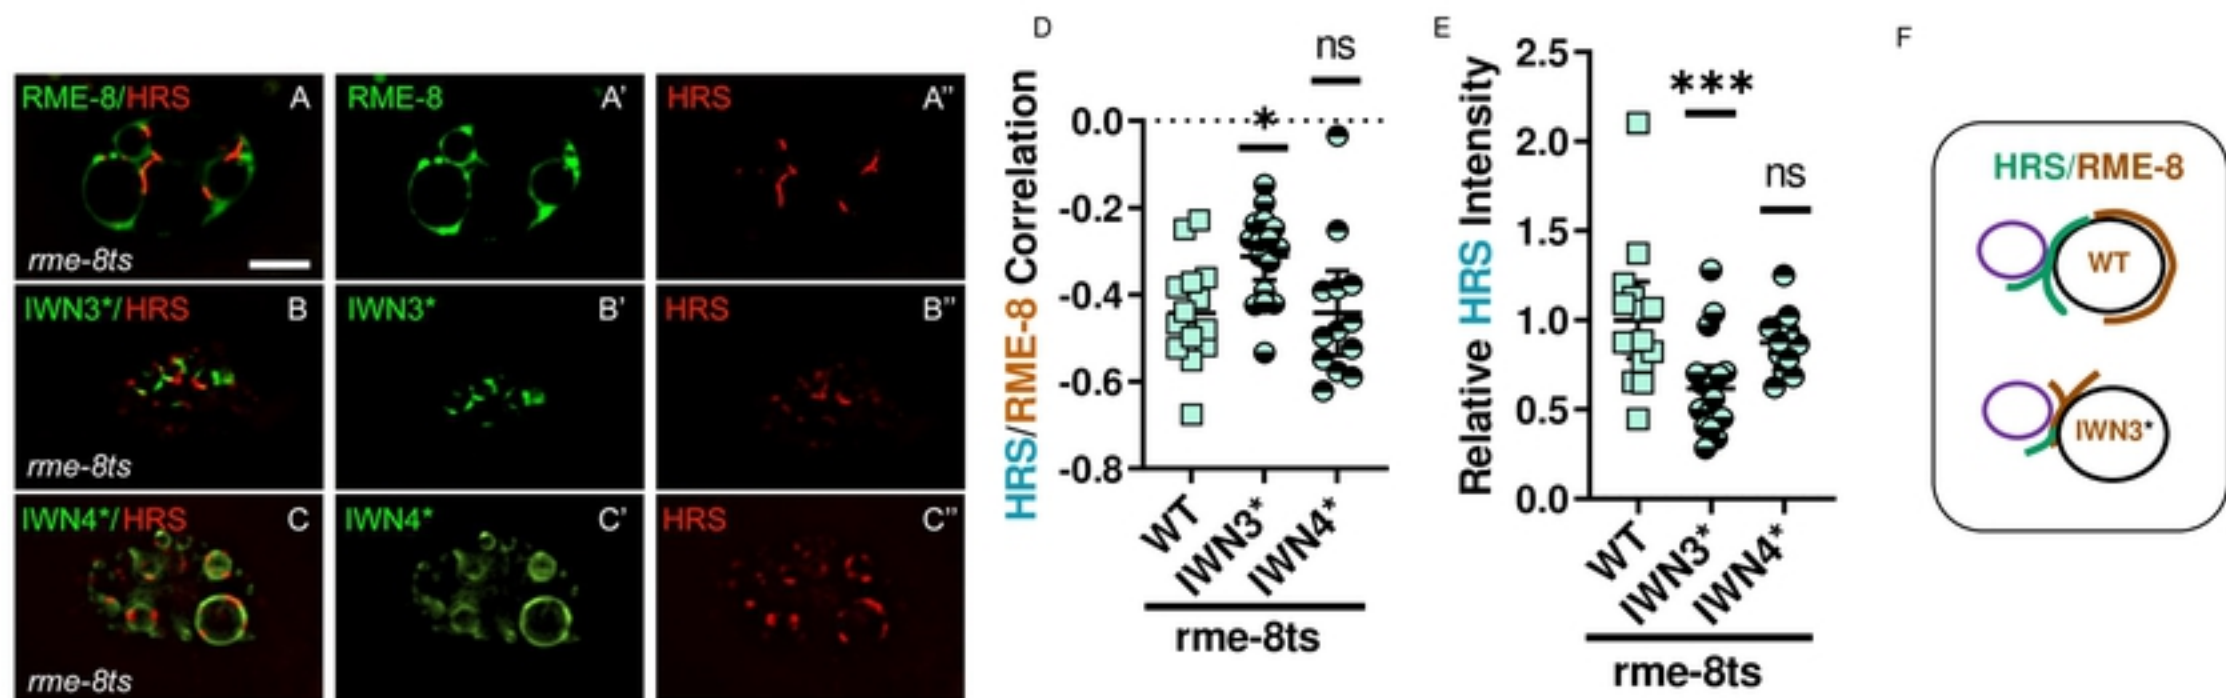

**Figure 5. IWN3\* mutant alters both RME-8/HRS colocalization and HRS accumulation. (A-A'')** Micrograph of pCUP-4::GFP::RME-8 co-expressed with tagRFP::HRS(HGRS-1) in coelomocytes of *rme-8(b1023ts)* animals. Single channels and the merge are displayed. **(B-B'')** Micrograph of pCUP-4::GFP::RME-8 D1657K mutation in IWN3 (IWN3\*) co-expressed with tagRFP::HRS(HGRS-1) in coelomocytes of *rme-8ts* animals. Single channels and the merge are displayed. **(C-C'')** Micrograph of pSNX-1::tagRFP::HRS(HGRS-1) co-expressed with RME-8 IWN4 triple glutamic acid to lysine substitution at positions 1959,1961, and 1966 (IWN4\*) in *rme-8ts* mutant animals. Single channels and the merge are displayed **(D)** Quantification of colocalization of HRS(HGRS-1) with RME-8 WT, IWN3\* and IWN4\*. **(E)** Quantification of tagRFP::HRS/HGRS-1 average intensity *rme-8ts* mutant animals expressing RME-8 WT, IWN3\* and IWN4\*. **(F)** Illustration of the interior shift and increased HRS overlap of the RME-8 microdomain that occurs upon the introduction of D1657K in IWN3 (indicated in brown). Illustration of the shrinkage of the HRS(HGRS-1) microdomain upon the introduction of D1657K in IWN3 (indicated in green). Each data point is an individual worm, error bars indicate Mean with 95% CI, ANOVA statistical analysis done in Prism with  $p < 0.5 = *$ ,  $p < 0.01 = **$ ,  $p < 0.001 = ***$ ,  $p < 0.0001 = ****$ . Scale bars are 5 microns in whole coelomocyte images.

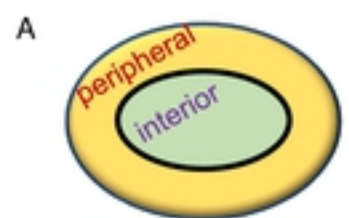

Interior intensity  
peripheral intensity

Equal distribution=0  
more internal >1  
more peripheral <1

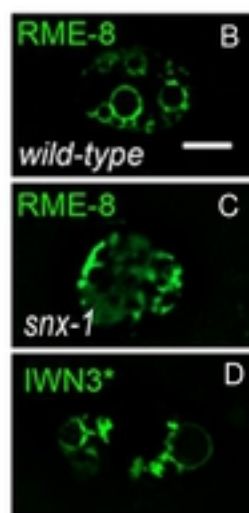

**I**  
interior vs peripheral (Log<sub>2</sub>)

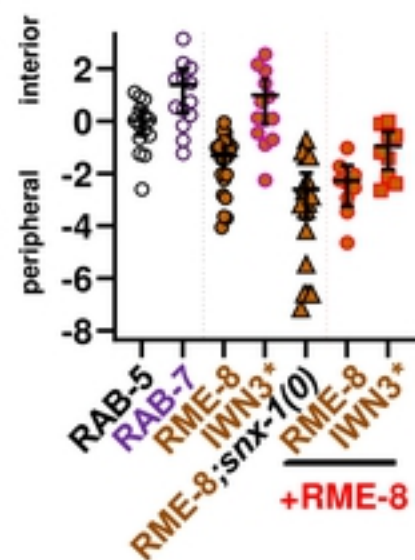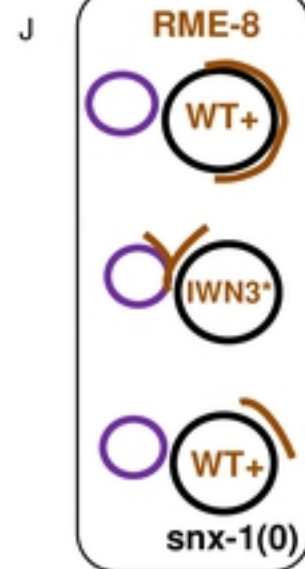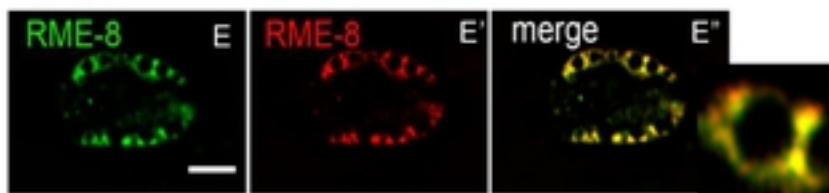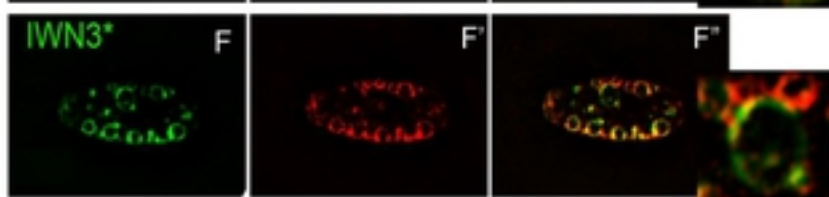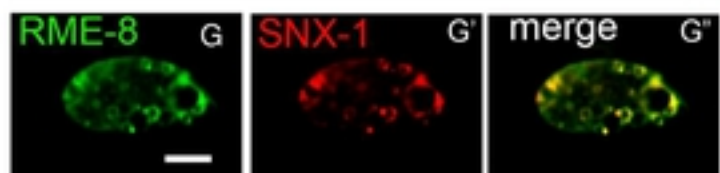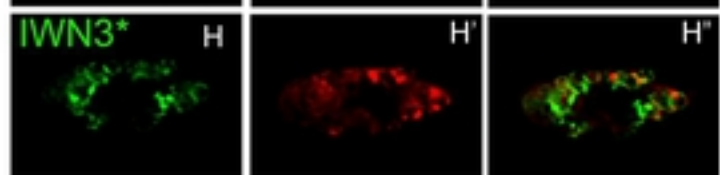

**K**

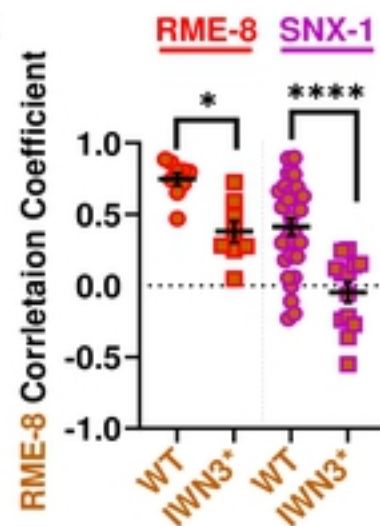

**L**

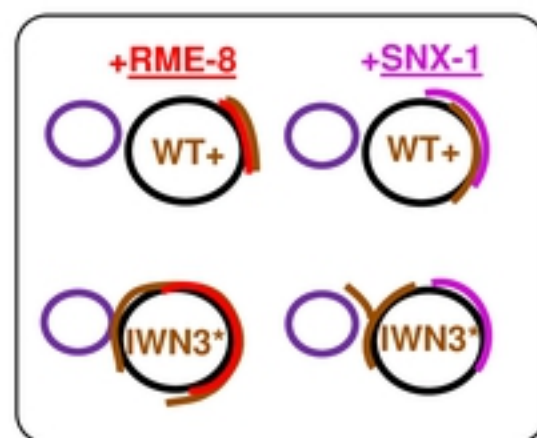

**Figure 6. SNX-1, IWN3\* and RME-8 expression levels control RME-8 microdomain localization and positioning.** (A) Micrograph of pCUP-4::GFP::RME-8 wild-type animals. (B) Micrograph of pCUP-4::GFP::RME-8 *snx-1(0)* mutant animals. (C) Micrograph of pCUP-4::GFP::RME-8 D1657K (IWN3\*) in wild-type animals. (D-D'') Micrograph of GFP::RME-8 co-expressed with tagRFP::RME-8 in coelomocytes. Single channels and the merge are displayed, with an inset of an endosome from the merged channels. (E-E'') Micrograph of GFP::RME-8 co-expressed with tagRFP::RME-8 in coelomocytes. Single channels and the merge are displayed, with an inset of an endosome from the merged channels. (F-F'') Micrograph of GFP::RME-8 D1657K mutation in IWN3 (IWN3\*) co-expressed with tagRFP::RME-8 in coelomocytes. Single channels and the merge are displayed with an inset of an endosome from the merged channels. (G-G'') Micrograph of GFP::RME-8 co-expressed with tagRFP::SNX-1 in coelomocytes. Single channels and the merge are displayed with an inset of an endosome from the merged channels. (H-H'') Micrograph of GFP::RME-8 D1657K mutation in IWN3 (IWN3\*) co-expressed with tagRFP::SNX-1 in coelomocytes. Single channels and the merge are displayed with an inset of an endosome from the merged channels. (I) Ratio of intensity of interior versus peripheral endosome labeling of RAB-5, RAB-7 (from figure 2B and 2C) and the indicated GFP::RME-8 allele from B-F'' plotted on a Log<sub>2</sub> scale. A value of 0.0 indicates intensity is equal between the peripheral and interior regions. A two-fold increase in interior intensity would give a value of 1.0 and a two-fold decrease would give a value of -1.0. See illustration in A. (J) Illustration of the interior shift of the RME-8 microdomain that occurs upon the introduction of D1657K in IWN3 (indicated in brown). (K) Quantification of colocalization of tagRFP::RME-8 (From D-E'') or tagRFP::SNX-1 (from F-G'') with GFP::RME-8 WT, IWN3\* and IWN4\*. (L) Illustration of the peripheral or interior shift of a wild-type RME-8 microdomain (indicated in red) that occurs upon coexpression with GFP::RME-8(+) or GFP::RME-8 D1657K (IWN3\*), (all indicated in brown). Illustration of the tagRFP::SNX-1 (indicated in magenta) colocalization that occurs upon coexpression with the introduction of GFP::RME-8(+), GFP::RME-8 D1657K (IWN3\*) (all indicated in brown).

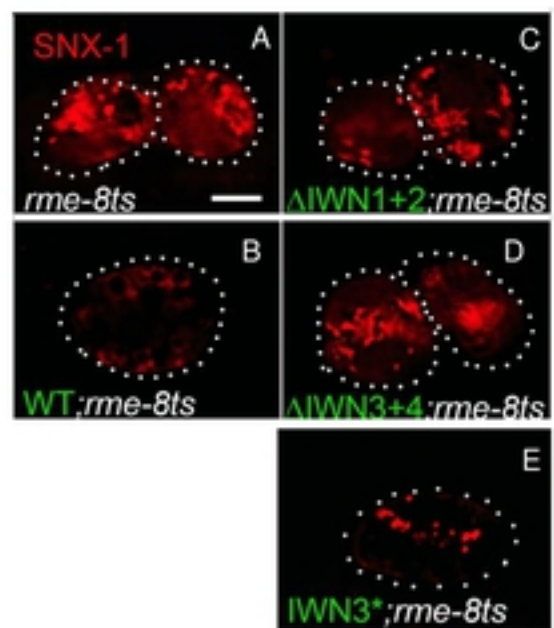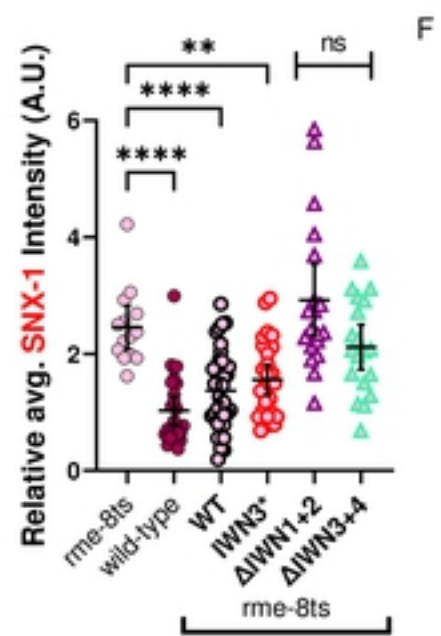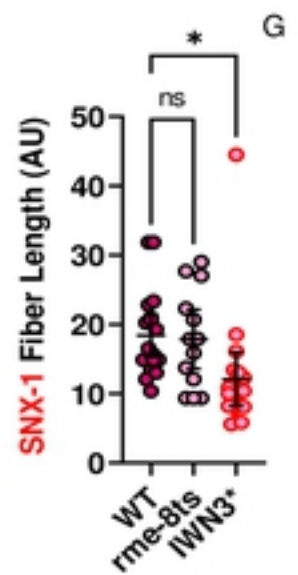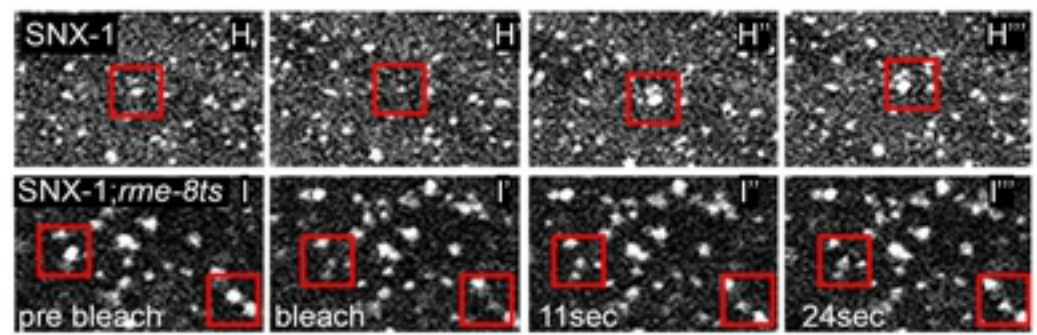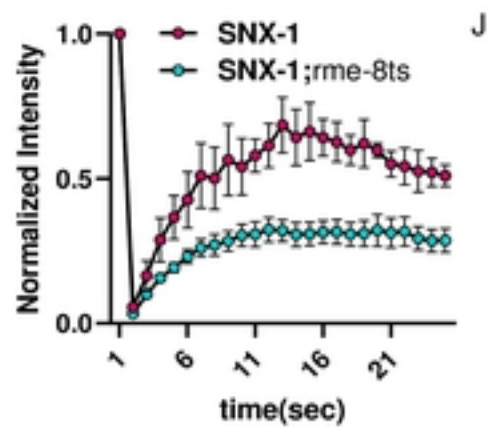

**Figure 7. SNX-1 is a target of RME-8 activity.** (A-E) Micrograph of tagRFP::SNX-1 co-expressed with GFP::RME-8 WT, N-terminal and C-terminal truncations, as well as the IWN3\* point mutant in *rme-8ts* animals. (F) Quantification of tagRFP::SNX-1 average intensity displayed in A-H. (G) Quantification of the fiber length tagRFP::SNX-1 microdomains in animals expressing GFP::RME-8, no RME-8 and GFP::IWN4\* in *rme-8ts* mutant animals. (H-I'') FRAP analysis of GFP-SNX-1 positive endosomes expressed in the hypodermis of wild-type and *rme-8ts* animals. Red squares indicate endosomes that were bleached. (J) Quantification of FRAP analysis of GFP-SNX-1 positive endosomes expressed in the hypodermis of wild-type and *rme-8ts* animals.  $p < 0.0001$ . ANOVA statistical analysis done in Prism,  $p < 0.5 = *$ ,  $p < 0.01 = **$ ,  $p < 0.001 = ***$ ,  $p < 0.0001 = ****$ . Scale bars are 5 microns in whole coelomocyte and hypodermis subcellular images.



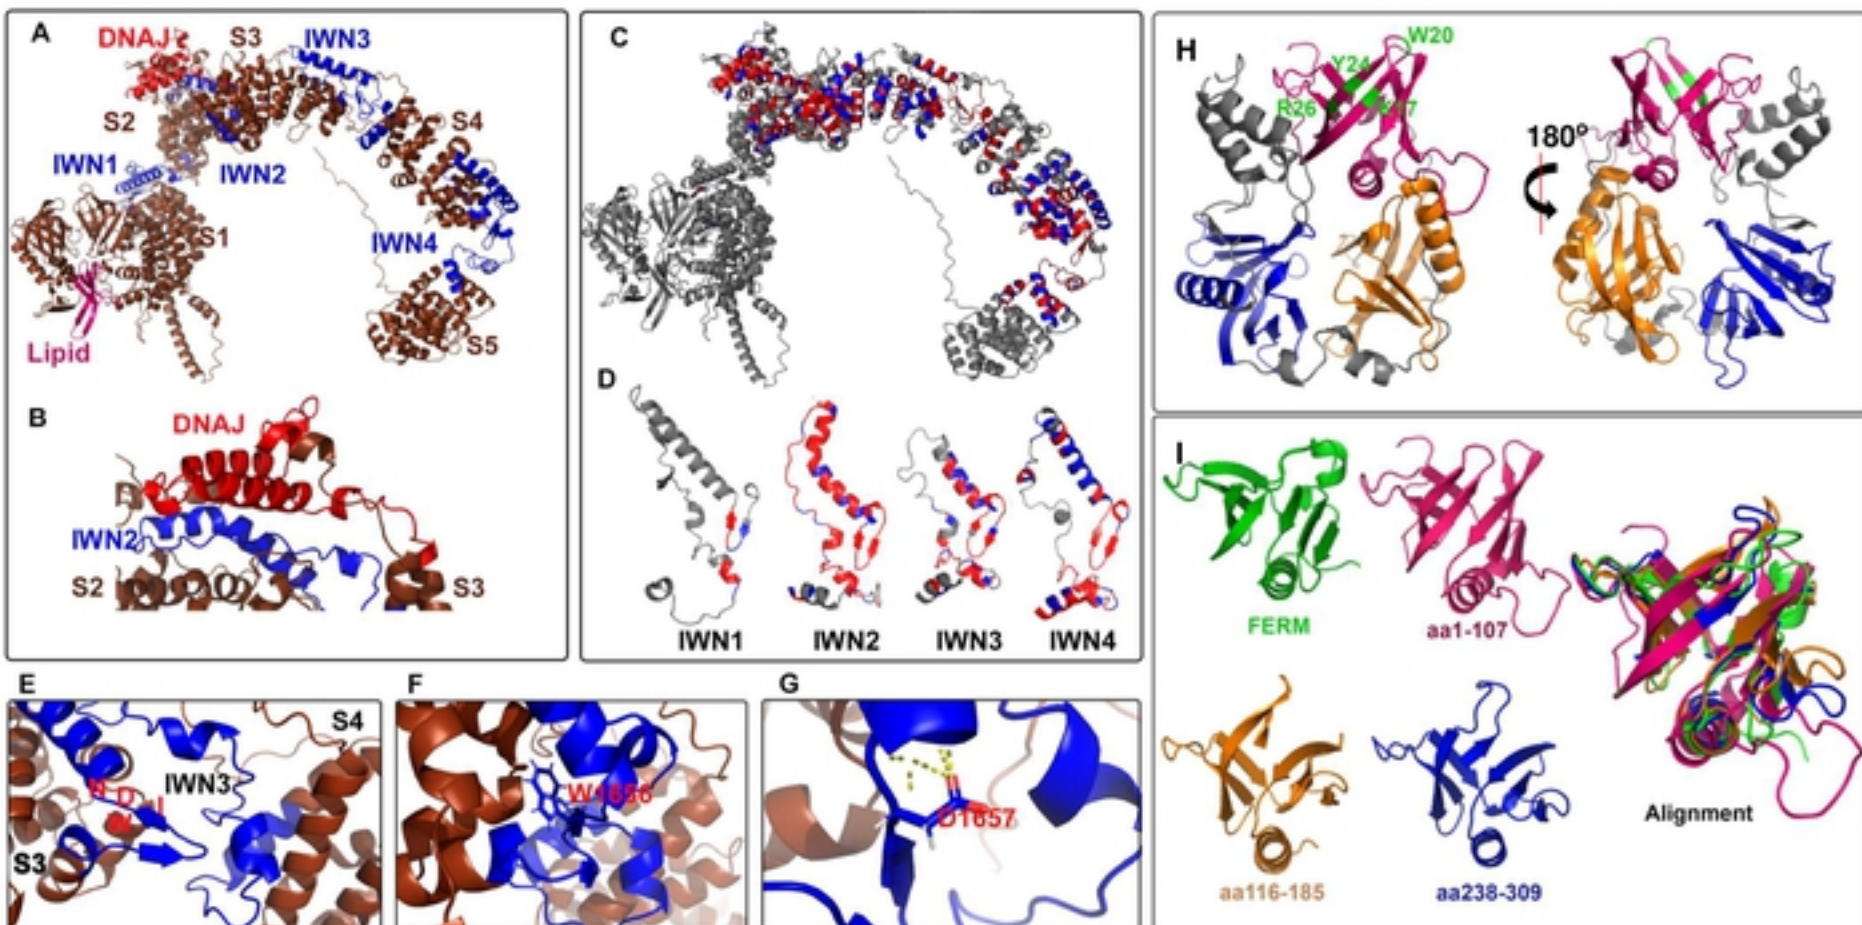

**Figure 8. RME-8 AlphaFold structural predictions: conformational control mediated by IWN motifs and lipid binding mediated by three PH-like domains.** (A) Ribbon diagram of AlphaFold generated PDB file. The previously defined lipid binding domain is depicted in magenta. IWN domains defined by Zhang et al 2001 are depicted in blue. The DNAJ domain is depicted in red. The five alpha-solenoid regions are labeled S1-S5. (B) A zoomed in view of the juxtaposition of IWN2 and the DNAJ domain, with portions of alpha-solenoid 2 and alpha-solenoid 3 that are separated by the IWN2 elbow-like structure. (C) ribbon diagram demonstrating the conserved residues from Figure 1 and Figure S1. Highly conserved residues are colored in red, moderately conserved residues are colored in blue. (D) Using the same color scheme as panel C, the IWN domains are represented to show their similarity in form as well as conservation across Eukarya. (E) A zoomed in view of the IWN3 linker between alpha-solenoid 3 and alpha solenoid 4. The position of the (I) Isoleucine, (W)Tryptophan, (D) Aspartic acid, and (N) Asparagine of the IWN3 domain are indicated in red. (F) The position of W1656 of the IWN3 domain is predicted to be buried, and on the opposite face of the Beta-strand as I, D and N. (G) The position of D1656 which is mutated to lysine in IWN3\* in the predicted structure. (H) Ribbon diagram of the first 400 amino acids of the AlphaFold generated structure. The previously defined domain is indicated in magenta, with key residues for phospholipid binding indicated in green. The two additional PH-like domains are indicated in blue and orange. (I) Ribbon diagrams of the FERM domains used to align to the three beta-strand rich regions of the N-terminus in green. The three PH-like domains of the RME-8 N-terminus are colored as in (H). An alignment of all four Beta-strand rich regions is shown to the right of the individual

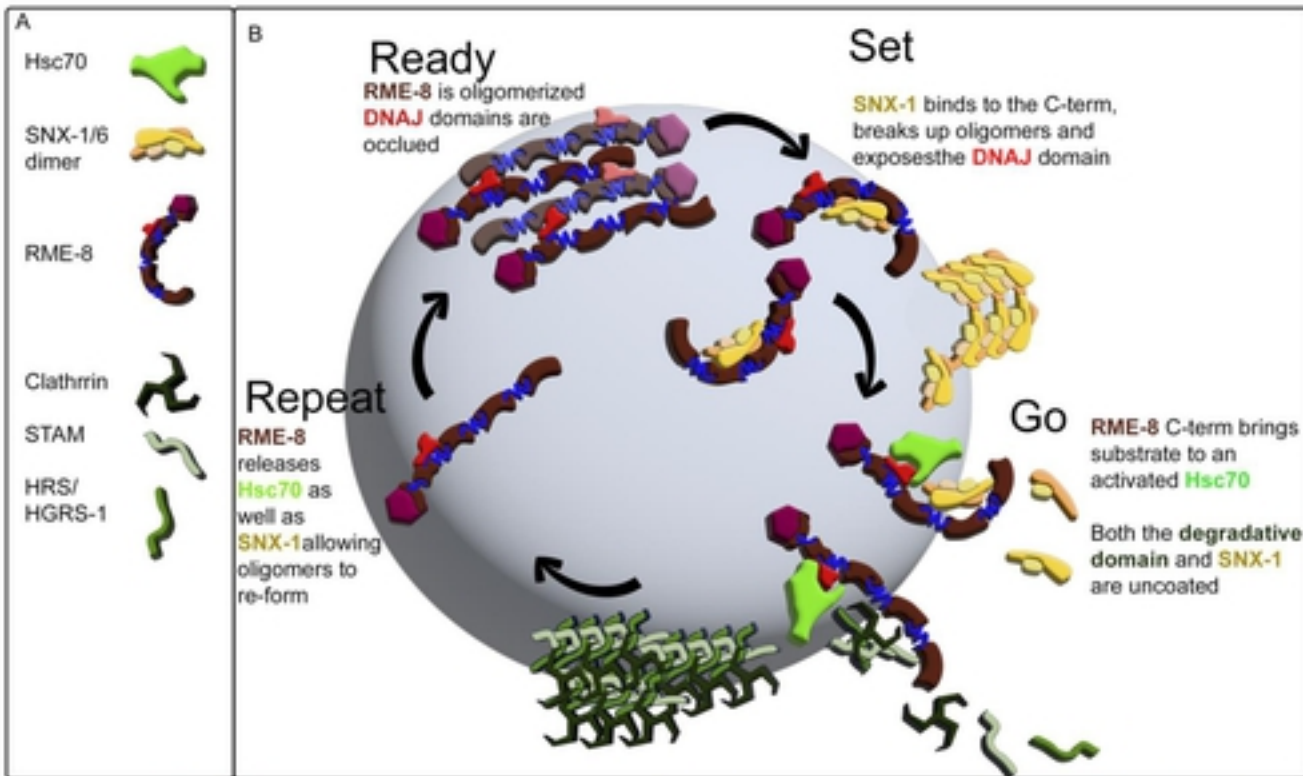

**Figure 9. Ready Set Go model for cyclical activation of RME-8.** (A) Legend (B) Illustration of the Ready Set Go Repeat model of cyclical RME-8 activation on the endosome. We propose that RME-8 exists in a few different states in the cell; an oligomerized inactive form with the DNAJ domain occluded (Ready), an open form bound to SNX-1 with the DNAJ domain exposed (Set). An active form bound by Hsc70 and substrate (Go). This model is informed by the idea that the RME-8 activator SNX-1 is also a target of RME-8 uncoating activity, allowing the process to be cyclical. (C) An illustration of the spread of RME-8 and accumulation of SNX-1 and HRS/HGRS-1 in coelomocytes expressing RME-8 C-terminal truncations. (D) An illustration of the model for how the IWN3\* mutant disrupts RME-8 oligomers independently of SNX-1 allowing for more RME-8 to be in the active "go" state. (E) Illustration of the proposed HRS/HGRS-1 and RME-8 oligomeric accumulation that occurs in *snx-1(0)* animals as observed in previous studies [10].

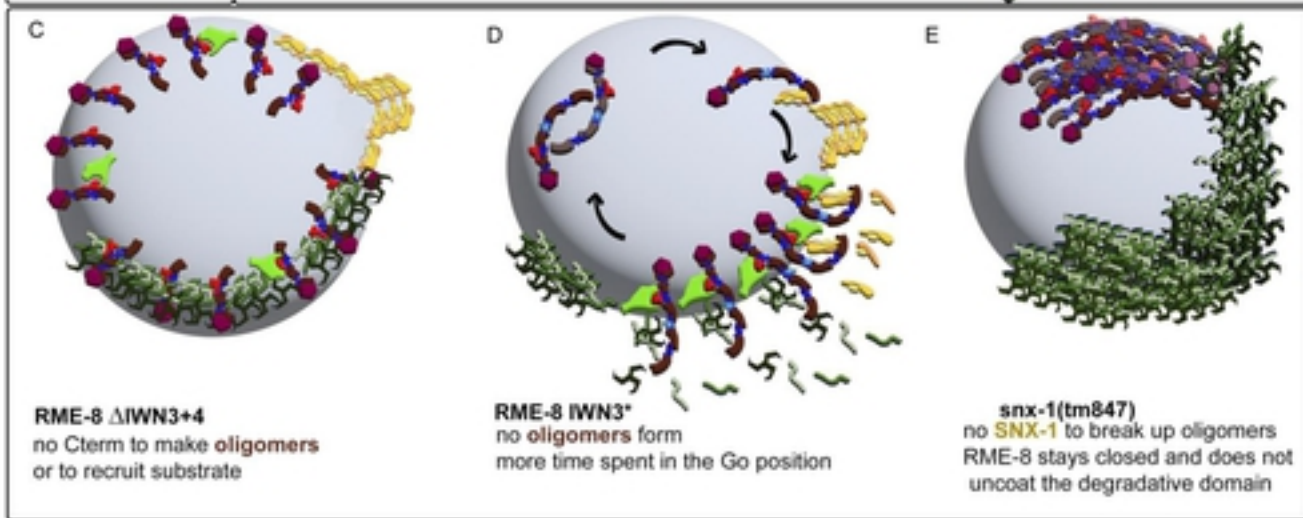

A

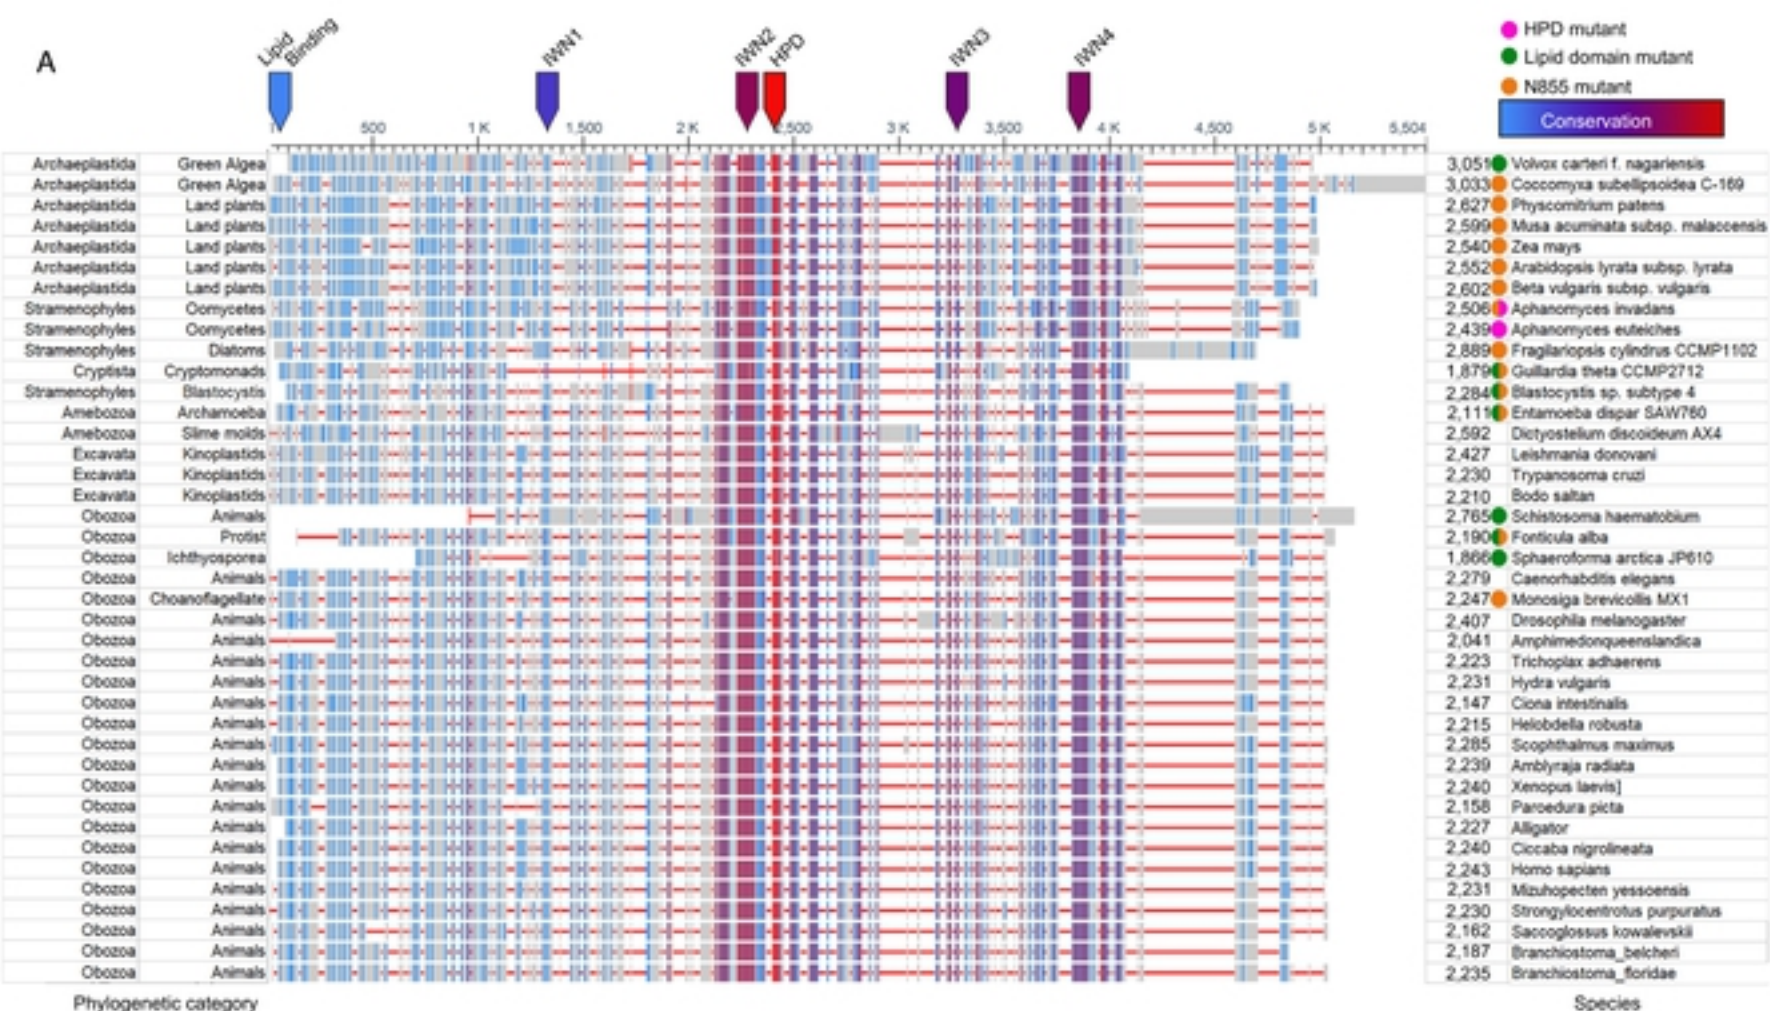

**Figure S1 supplement to figure 1.** (A) Expansion of figure 1C with more organisms included. (B) Annotated display of *C. elegans* RME-8 sequence from the multiple sequence alignment in Figure 1B. The defined lipid binding domain from [6] is indicated in cerulean. The predicted expanded lipid binding domain from this study is indicated in magenta. IWN repeats defined by [2] are highlighted in green. The DNAJ domain is highlighted in grey. Yellow arrows indicate regions of high conservation that lie outside of established functional domains. Individual amino acids are colored according to conservation across Eukarya with grey indicating no conservation, blue indicating moderate conservation and red indicating high conservation.

**B**

1 8)---ENRDIACVLYTR-HGWKQYKRV FSTGTLAETVNPNTL-EITNQLVYE-DPLSVKPLRNGLSISDQSK 71  
 72 DEYKIVRNR---G KN NDRRF---SSDYTTDLTHCLQ FSTKFDKNF---EP---LTVTAFKQSWSDRRIP 131  
 132 VTLRANASCLEQI D-NRGVVVQSYPKNIRSIGK---VSDCPGGFVVDVGEHRRRHMFA---SSNNEELVKEIRRL 200  
 201 ASDNIGIIVPI AKEQLT---LEDF MRTLGLCSRDEELTSYAEFKISKI TRRNE M--PVRRLLCLSE 262  
 263 TCIIERDLATYA VICATPLKHIVCLVRSEKDPQGFIVEYENGOG-RAYVA-AERDLILASLLDGIIRASG--NNEVFV 335  
 336 CGHRFERNLRV IPFSTNLDEDESQCHK-HI I APPP GIR RC DLIRRFNANVPYSGL-R 391  
 392 FSKSHEGFFSEKNG-KVIVNAIEAVL=ENYTK DKEYKH--KTE---AQLQCLRRFLFASKSGFQAFTE VNGVR 458  
 459 EKLGLVWRVLSMKSESIDHSTVEALCALMY P MHD-QVELRIEQ---LN KQSLMSSP---KFVENLLOLI 521  
 522 V LHVDRSTG WLVIASMLNFTFSVCSPYSET---TAGDTFDHIL KLVSLR-GRSFFRLFCQPSMTIVKGA 587  
 588 GMV MRAIIIEAD-VETSKSMQMLALS--EGAFLTHLFMSLLST GK-DLRVMTN KQLSGHLISLWIAD-- 650  
 651 NQQANDLLIRCLPRGLLNYESDEKVPVNEK--D LLIVRNNFDAAS ----NET-KQNAKKEK[2]LRV[2]E 714  
 715 AGLERFVQH WdIEQKLNFLPKRVI[4]QQRQ QPVVL-RK RNRVRPN VNWKLFAY SQA 781  
 782 848  
 849 VVYHRFL LSTK-VD---M KCLCLRAMAITYSRHMTIG---AFQDSKYFVEHLQK 909  
 910 CINPLERDHLVLLL SKLA LN KDWRELI-IS-NILPLLVDLCVLAHLH VQR AKVQNTNVIE-- 969  
 970 ASAEQM AEGGSEE WYM-D KD A K QVGPLSFEKMSLYTEKTI FEKSQIWAAGMD KW 1024  
 1025 MSIAAVPQFRMTV[9]INTGK[5]T VMNFTDLSVLCCLDTILQICEFFPSRDSH-D-CVVRPMPVSKKQLTE P 1102  
 1103 VL--LYQLVQLLLTYEPQIVORVALLLVLVQDNPEL-PR-LYLSGVFYFILMYNGSNVLPITARELHYTHMKQAFERS --- 1175  
 1176 TL--PQF-EGQRQSVLATLLPEAATFYLEQYGPEKYAEVLSG KQMSLNTA H LERAV 1250  
 1251 1326  
 1327 SVDLTNEE HRKPAFIRRQYKLAAKYHPDKNPEG--RE---MFERINAAYELL---S--SE-TANN--SGM PD 1386  
 1387 SHR--IVLCLQAQSIISRYSQELSEYKYAGYSQLIKTIDLEAKDEALF--I KGGdLLSAAIELANYTLISSALN 1458  
 1459 AEQLRRDNGLEALVIAFDRCPMV THSSLFD DMAVRVCIHVCDCFATAATFEACRQLMEM P SIFG 1524  
 1525 AL-TRLLQF-SNLPR LSTAAQCIRAMAVD---TL-LQFQLFQT-GY-LWQLVPHLFHFQYTL DEGGVQHSFD 1589  
 1590 SNK QSLANSLARSSCEALAAL-AGFR -- EN---TP DNDQVQASLRALLTPYICRM KL- 1641  
 1642 -ET NDMVLK 1696  
 1697 1763  
 1764 A[2]NSLDT ET KVLMTM-TALANLV---SANPGA[8]E ILLIGNFPLLITYLRCR KHPK LQI 1825  
 1826 AALQVILLAAANKECVTDLA TCN-VITTLFTLLRD QPKMI-AR-VLDVLI LSSNGQTGKEMLEHGGLMY 1892  
 1893 ILSILCITN SDQG QRLQAEALLAKLQA-DKLTGPRMTRFIIKELPEIFADS LRDS-NTALQ 1963  
 1964 2032  
 2033 2094  
 2095 LQNTS ASR SAILILQELSEN QFCCDALSQLPC-IDGIMKS-MKNQPS--LMRE-SAHALKCLMKRN-T 2156  
 2157 GE---LAQQMLSCGMVYLLQ-VLDS-SMN GVSNGAARAIEVDALKSA---ILDLVG QKIAEILDKSPVW 2220  
 2221 AQ-FKDQRHDLFLPE--ARTQA-ITG--GP-tGV--AGY LTEGMF NPPPMsNQPPP MHQTSGD[ 5] 2279

Lipid binding

Predicted lipid binding domain expansion

IWN1

IWN2

DNAJ

IWN3

IWN4

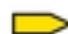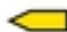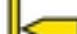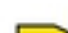

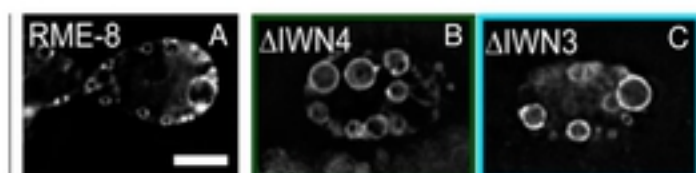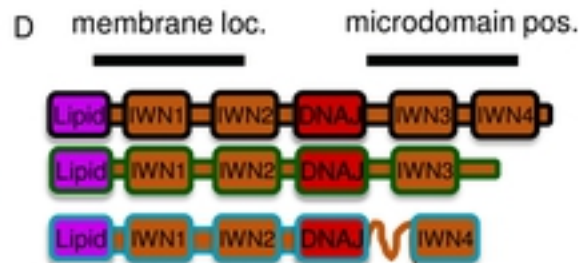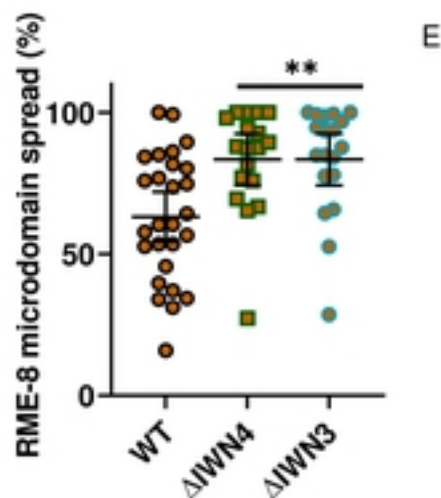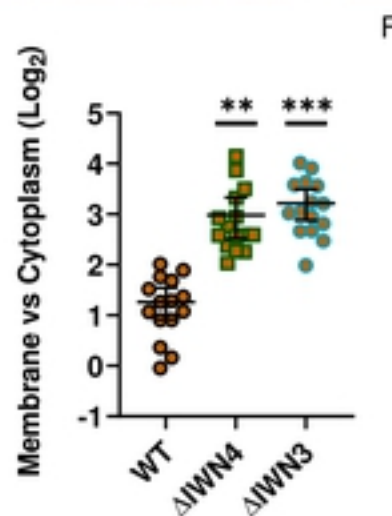

**Figure S2 supplement to figure 2.**  
 (A-C) Micrograph of pSNX-1::GFP::RME-8 full length,  $\Delta$ IWN3 and  $\Delta$ IWN4 truncations, expressed in wild-type animals. (D) Illustration of wild-type,  $\Delta$ IWN3 and  $\Delta$ IWN4 truncations of RME-8. (E) Quantification of the percentage of an endosome covered by the indicated GFP-RME-8 wild-type and truncation mutants. (F) Ratio of the GFP::RME-8 intensity in the cytoplasm versus on the membrane in the indicated GFP::RME-8 wild-type and truncations. The values are also plotted on a Log2 scale. All micrographs are deconvolved widefield images (see methods). In I-K each data point is an individual worm, error bars indicate Mean with 95% CI, ANOVA statistical analysis done in Prism with  $p < .5 = *$ ,  $p < .01 = **$ ,  $p < .001 = ***$ ,  $p < .0001 = ****$ . Scale bars are 5 microns in whole coelomocyte images.

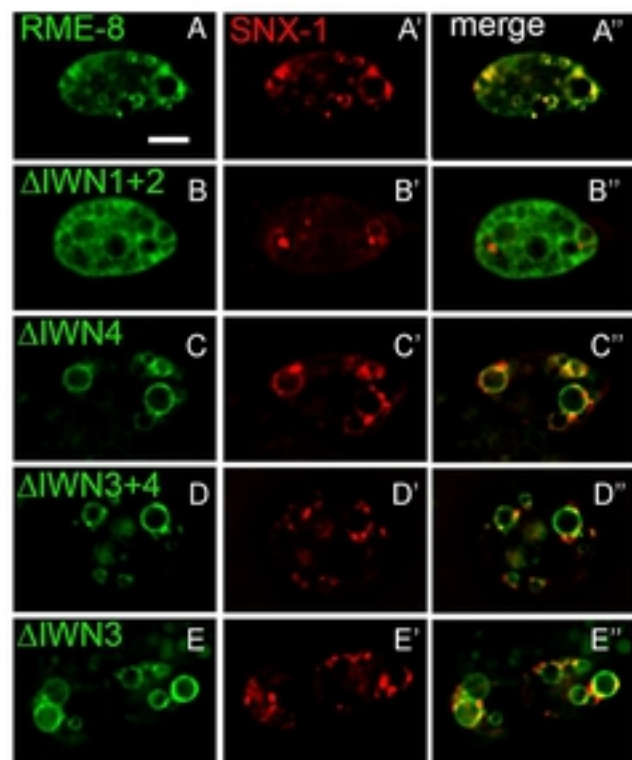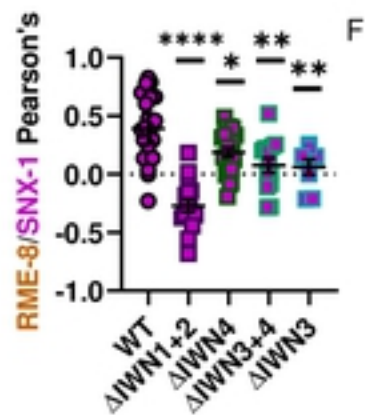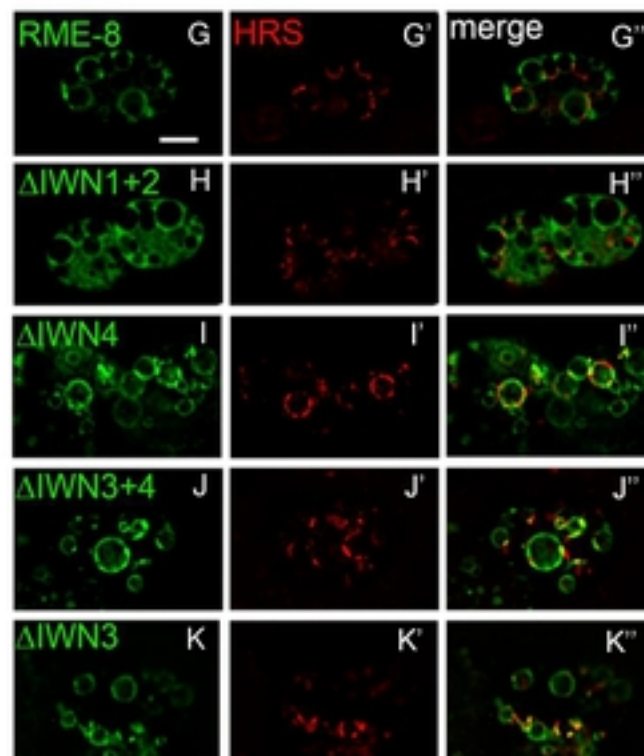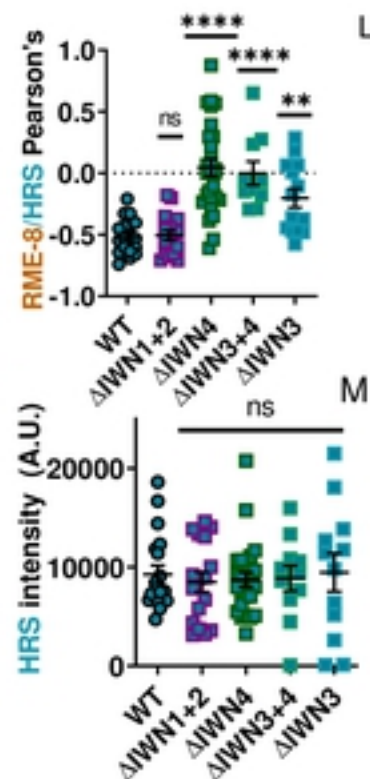

**Figure S3 supplement to figure 3.** (A-E'') Micrograph of pCUP-4::GFP::RME-8 wild-type, N-terminal, and C-terminal truncations co-expressed with tagRFP::SNX-1 in coelomocytes of wild-type animals. (F) Quantification of colocalization of pCUP-4::GFP::RME-8 wild-type and truncations with tagRFP::SNX-1 in coelomocytes of wild-

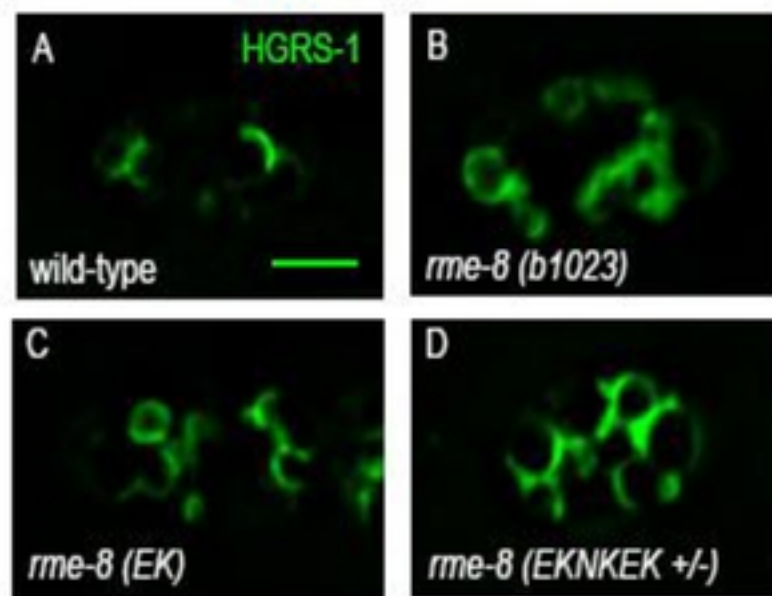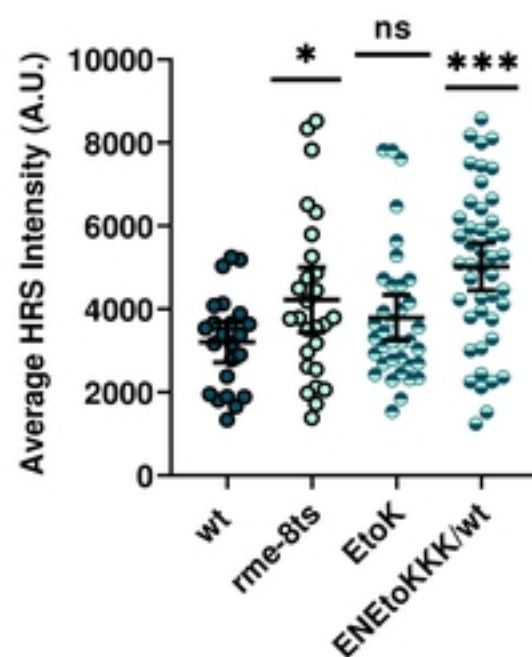

**Figure S4. Supplement to figure 5. IWN4 mutants are defective in removing HRS/HGRS-1. (A-D)** Micrograph of pSNX-1::Citrine::HRS/HGRS-1 expressed in coelomocytes of wild-type (A) *rme-8ts(b1023)* animals (B), CRISPR generated *rme-8* E1962K animals (C), and heterozygous CRISPR generated *rme-8* (E1962K/N1966K/E1967K) animals (D). **(E)** Quantification HRS/HGRS-1 average intensity animals represented in A-D. Each data point is an individual worm, error bars indicate Mean with 95% CI, ANOVA statistical analysis done in Prism with  $p < .5 = *$ ,  $p < .01 = **$ ,  $p < .001 = ***$ ,  $p < .0001 = ****$ . Scale bars are 5 microns in whole coelomocyte images.
